# Supplementary material for: Small heat shock proteins operate as molecular chaperones in the mitochondrial intermembrane space
Source: PubMed Central journal article supplement (PMC10014586; doi:10.1038/s41556-022-01074-9), 2023-01-23
Supplement: 41556_2022_1074_MOESM3_ESM.pdf [file 41556_2022_1074_MOESM3_ESM.pdf]

1  
2  
3  
4  
5  
6  
7  
8  
9  
10  
11  
12  
13  
14  
15  
16  
17

Source data files (Figure 1)

Figure 1a (HeLa)

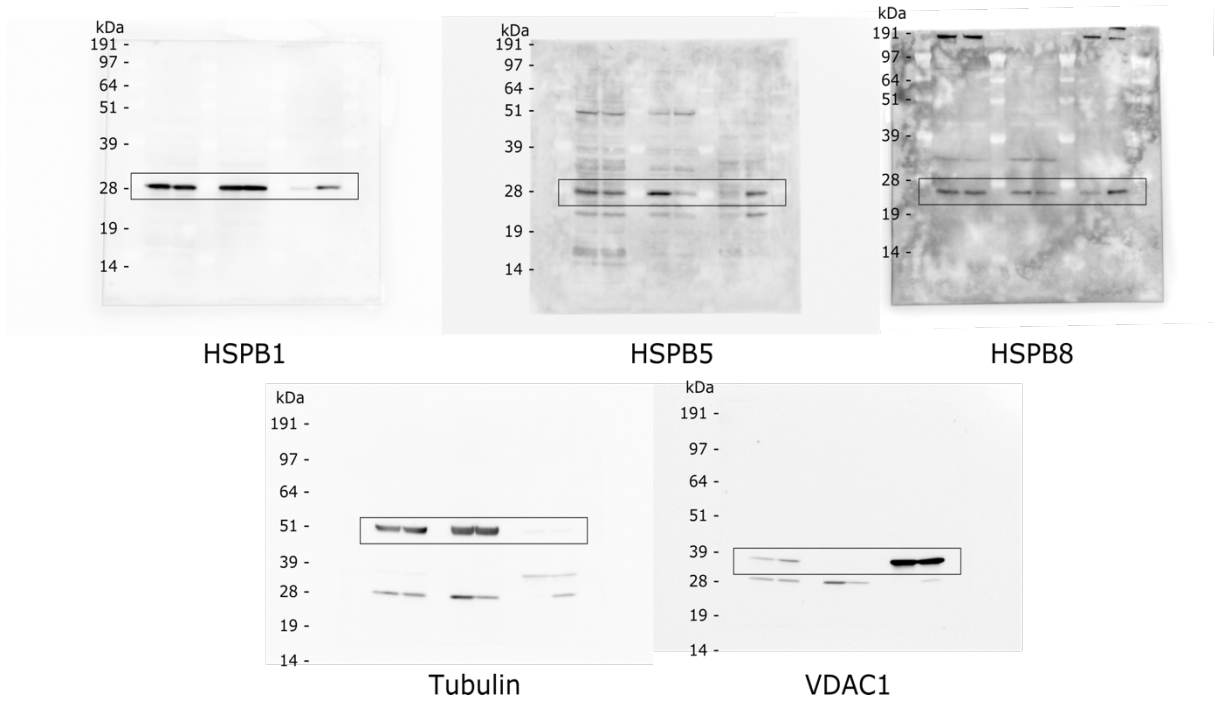

18 **Figure 1a (C2C12)**

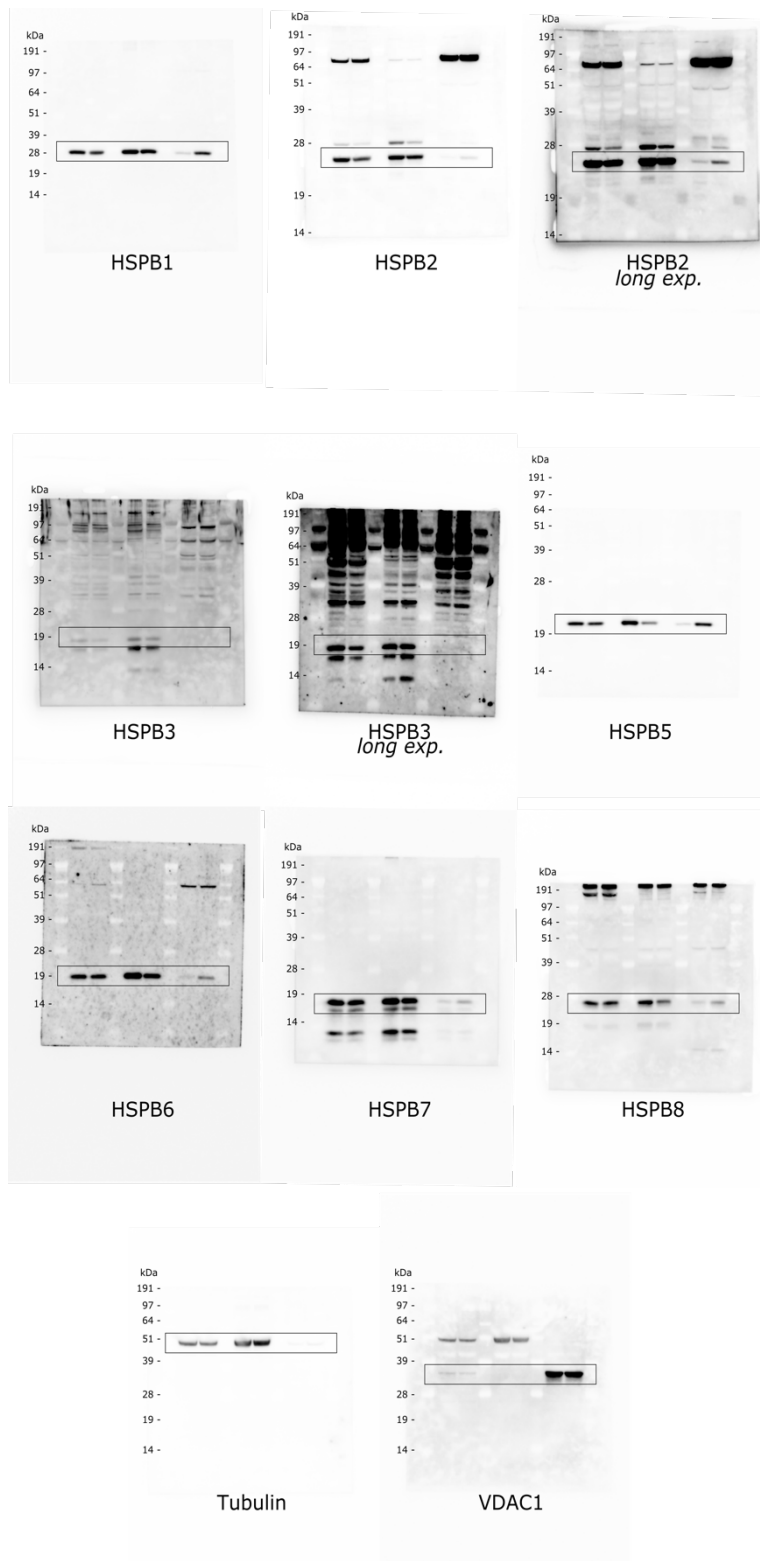

19

20

21

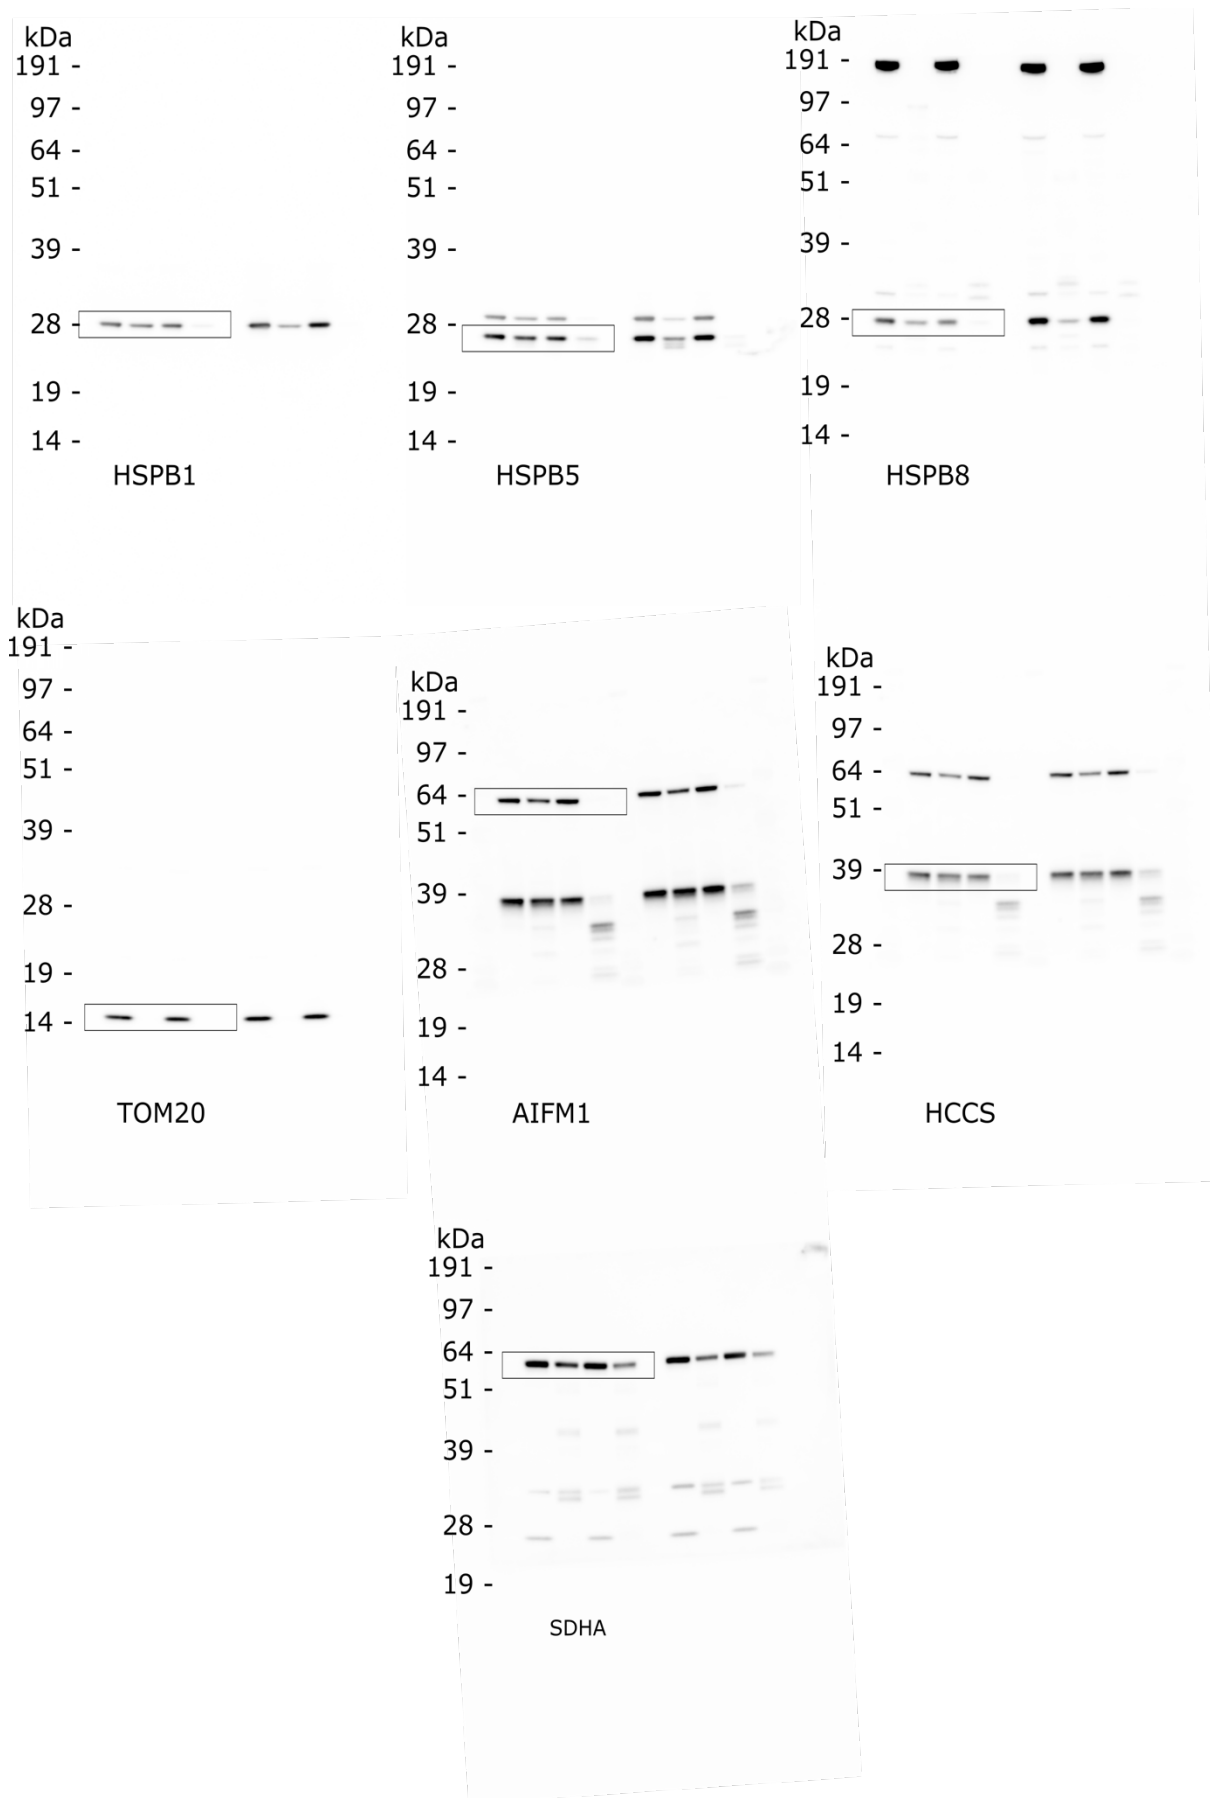

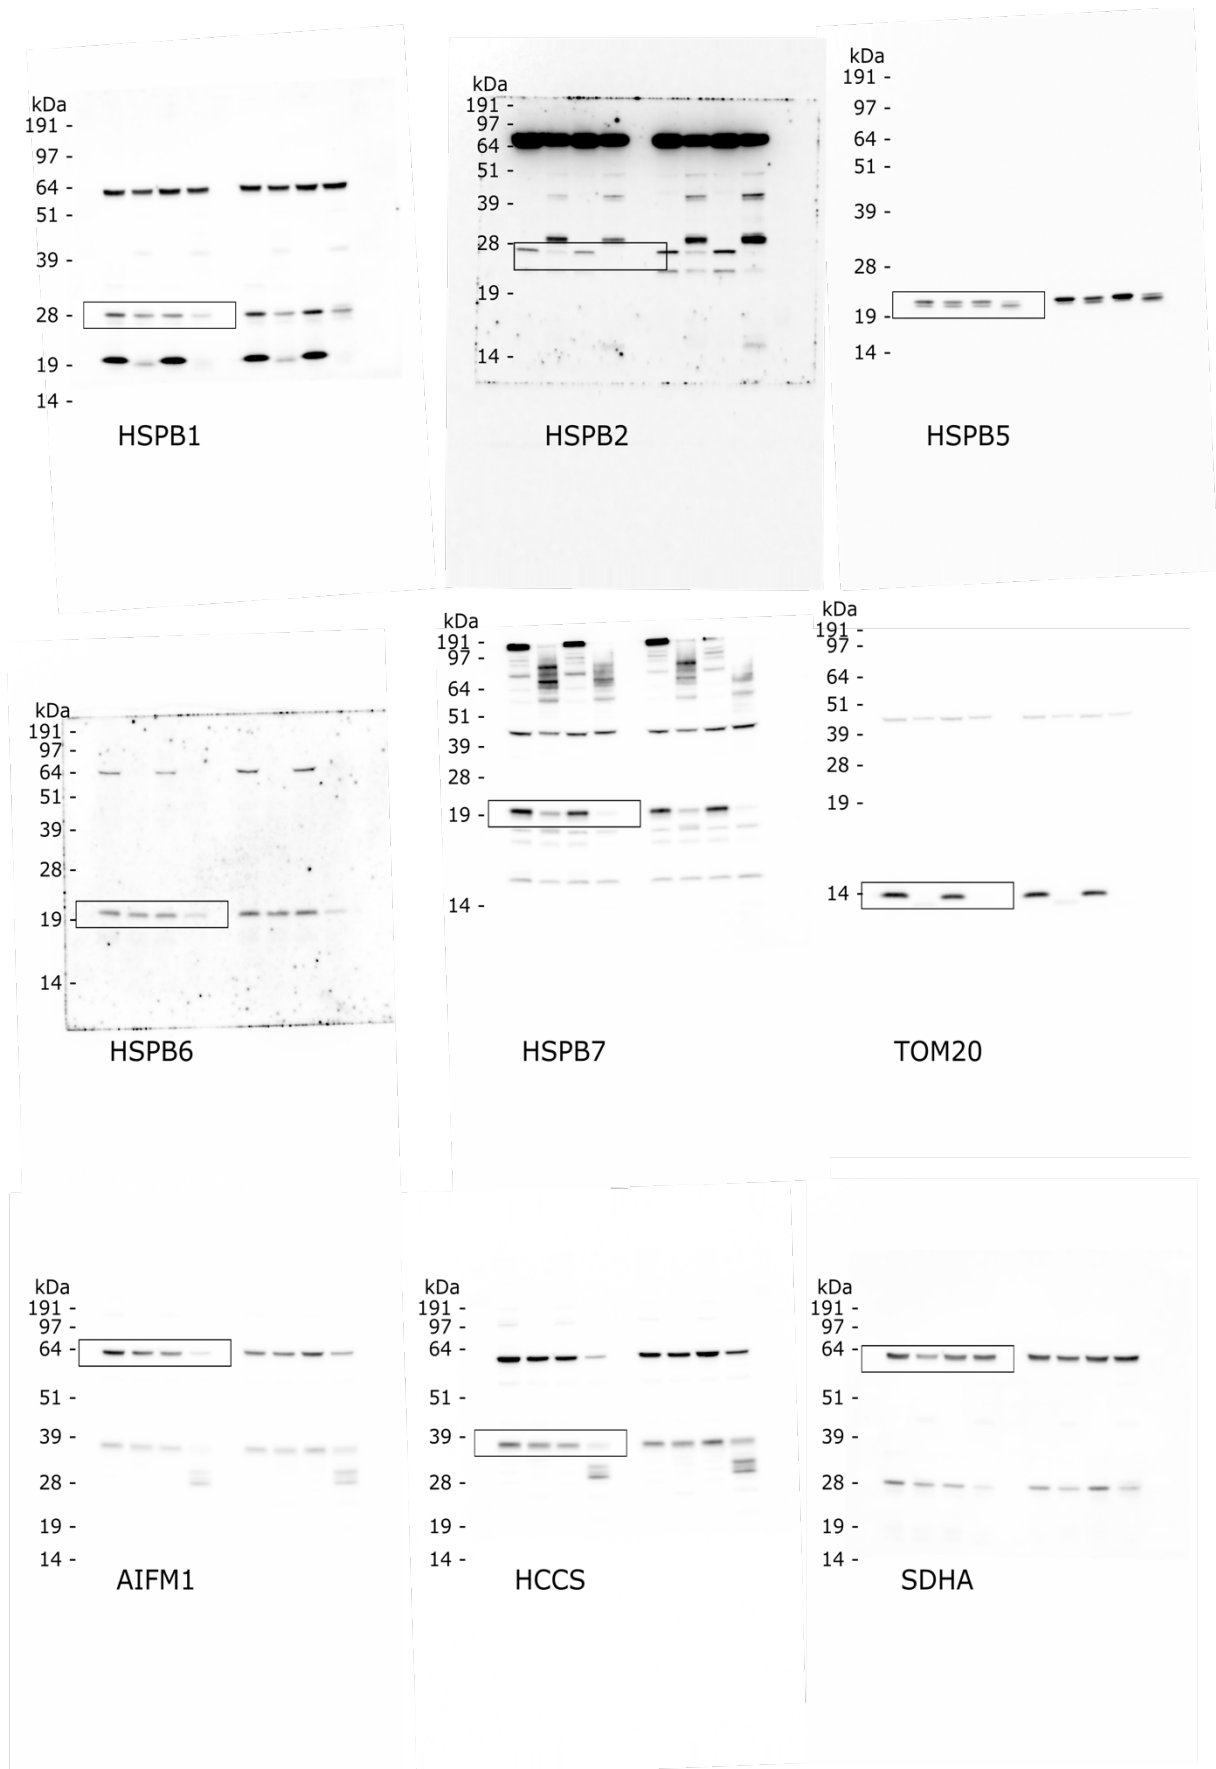

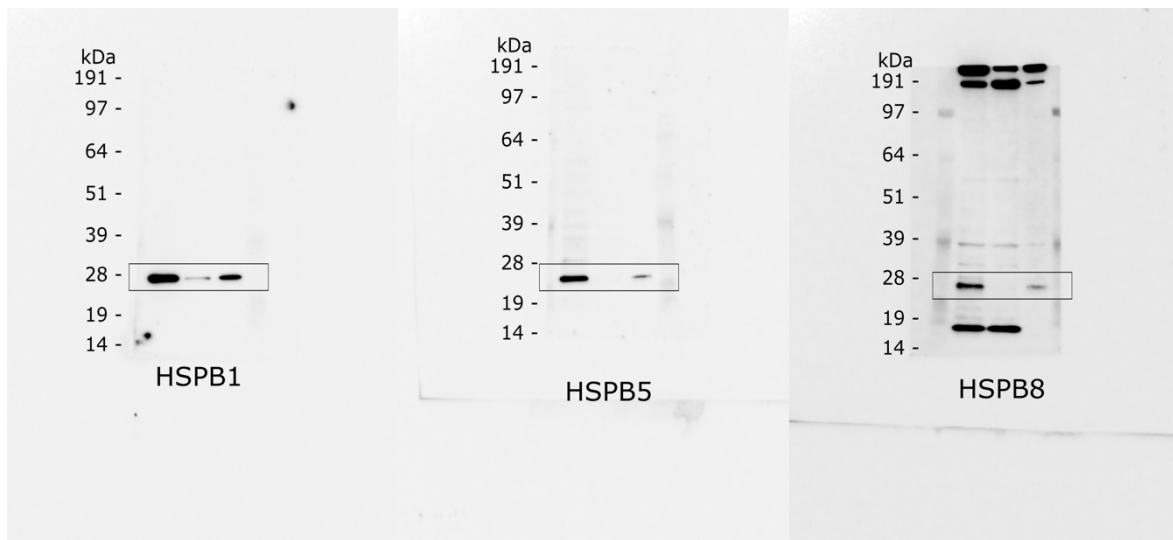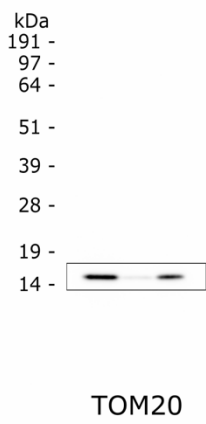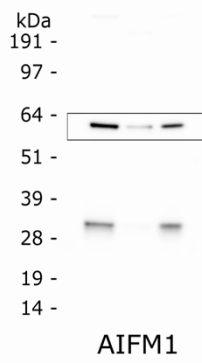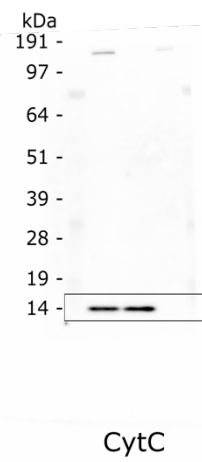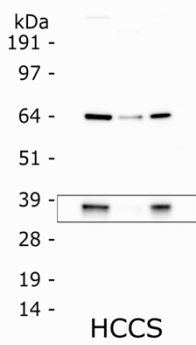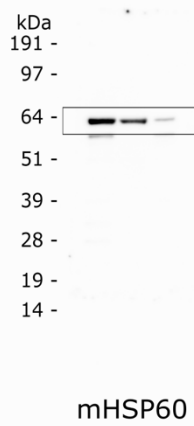

29 **Figure 1f**

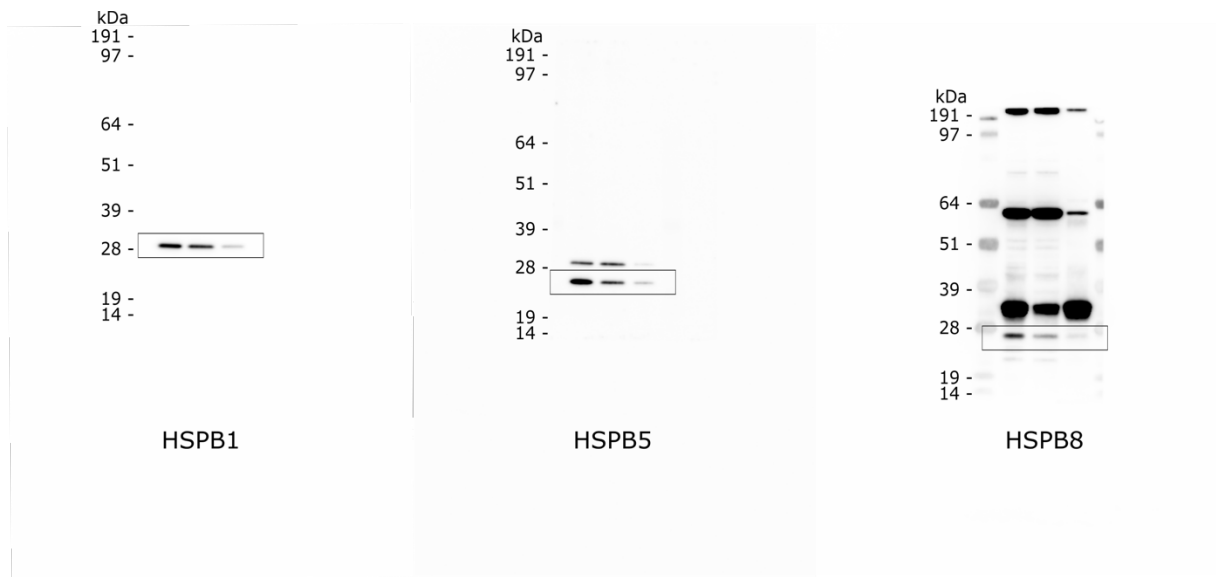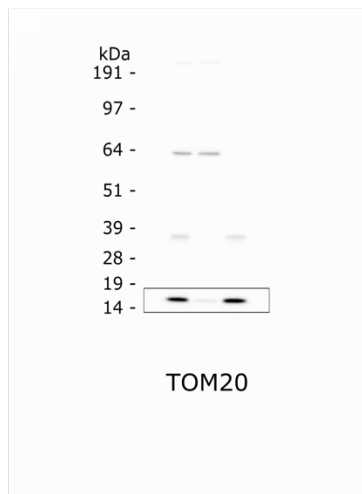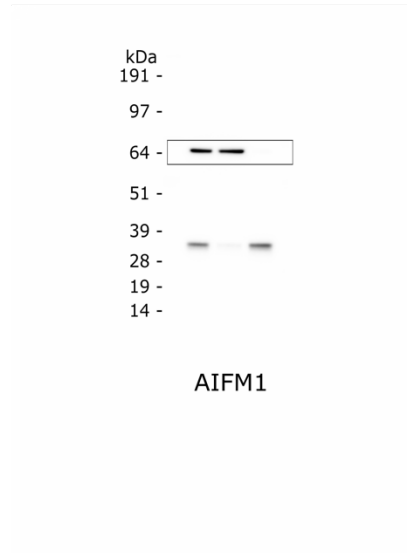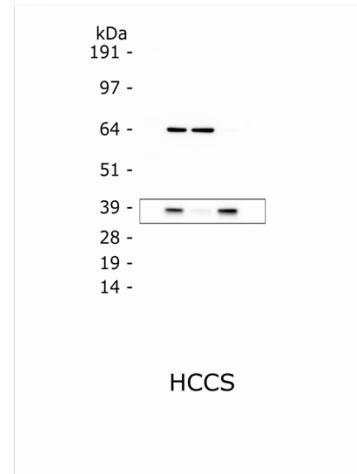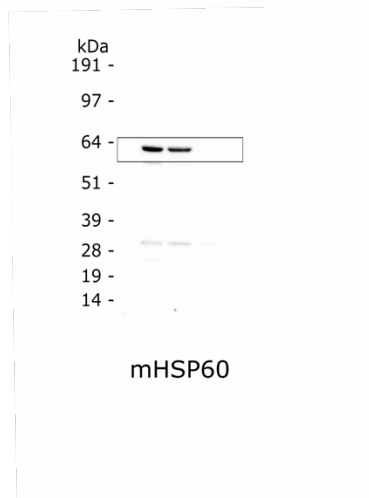

30

31

32 **Figure 1g**

33

34

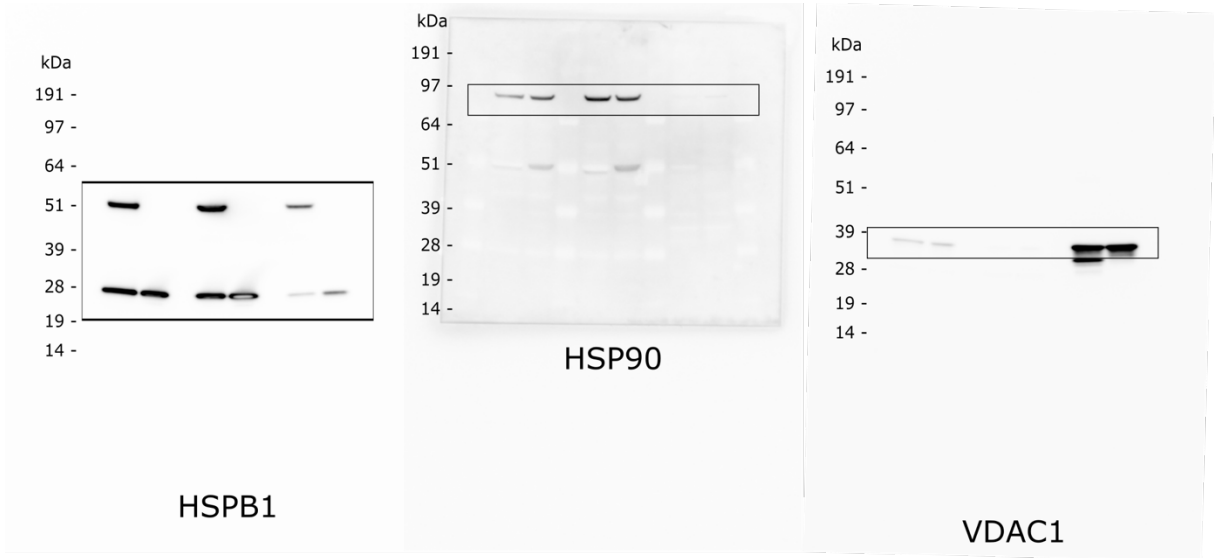

35
