# Supplementary material for: Small heat shock proteins operate as molecular chaperones in the mitochondrial intermembrane space
Source: PubMed Central journal article supplement (PMC10014586; doi:10.1038/s41556-022-01074-9), 2023-01-23
Supplement: 41556_2022_1074_MOESM5_ESM.pdf [file 41556_2022_1074_MOESM5_ESM.pdf]

1

Source data files (Figure 2)

2 **Figure 2a**

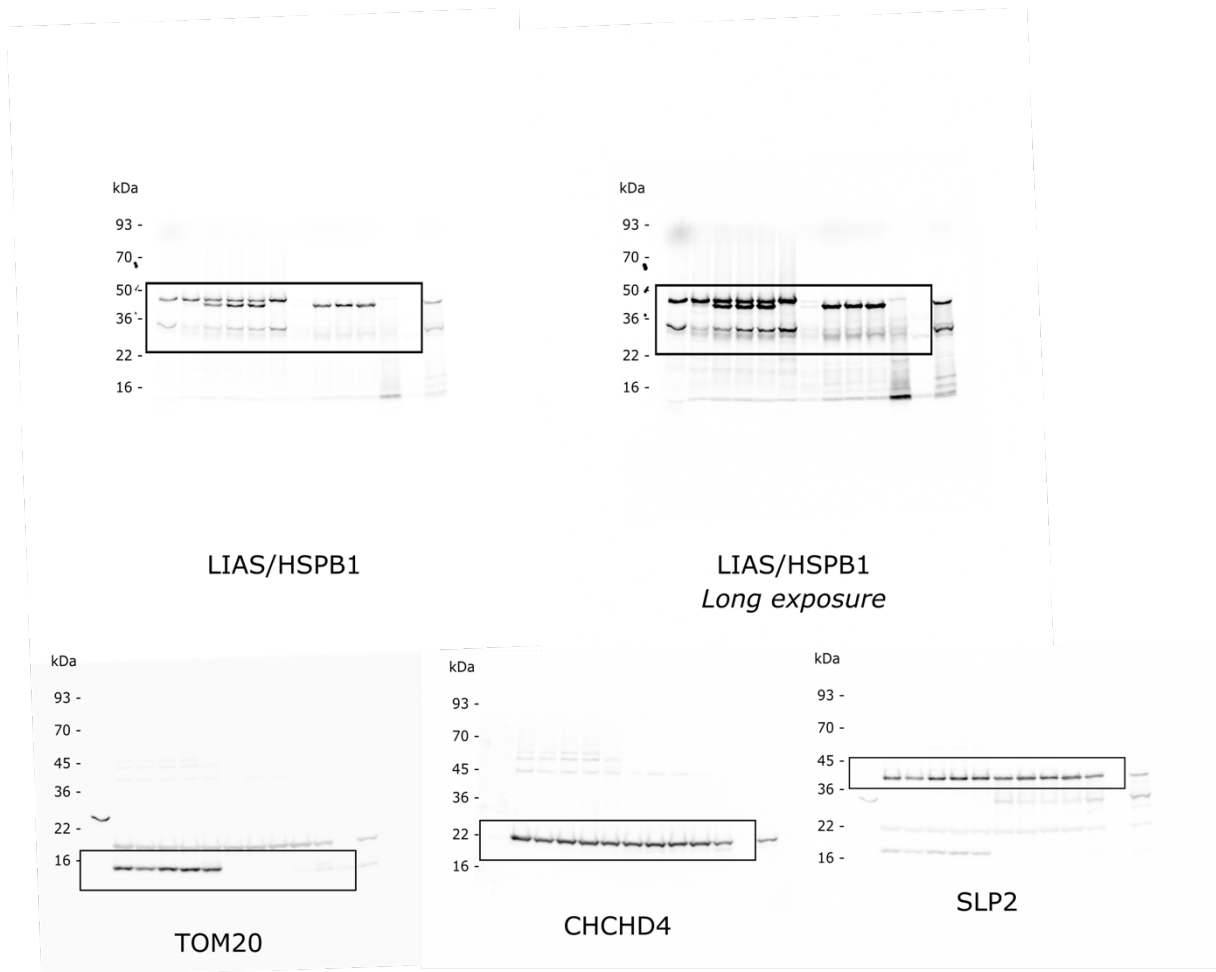

3

4

5

6

7

8

9

10

11

12

13

14 **Figure 2c**

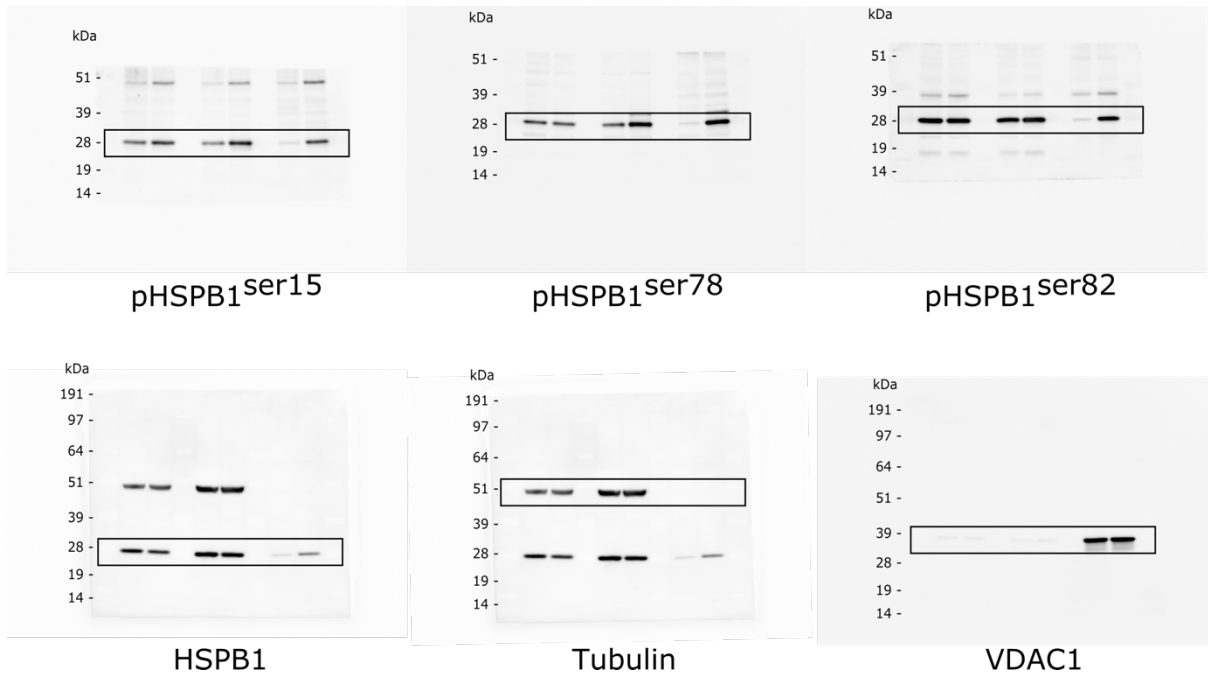

15  
16  
17  
18  
19  
20  
21  
22  
23  
24  
25  
26  
27  
28  
29  
30

31 **Figure 2d**

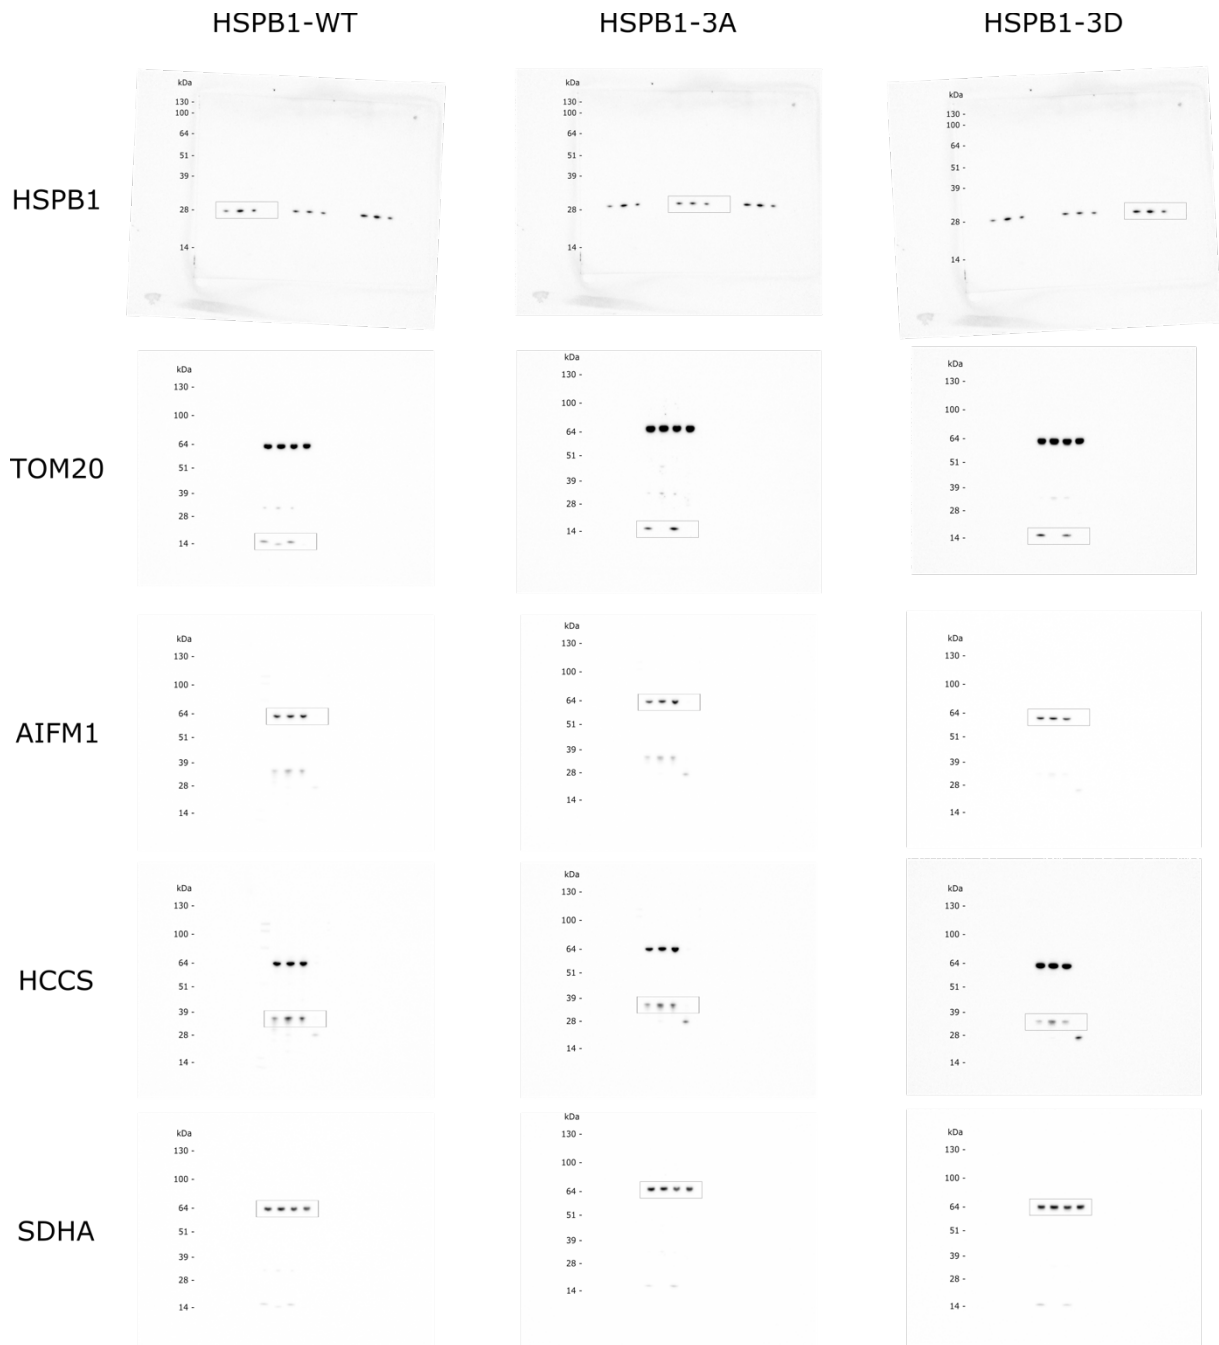

32

33

34

35

36

37

38

39 **Figure 2e**

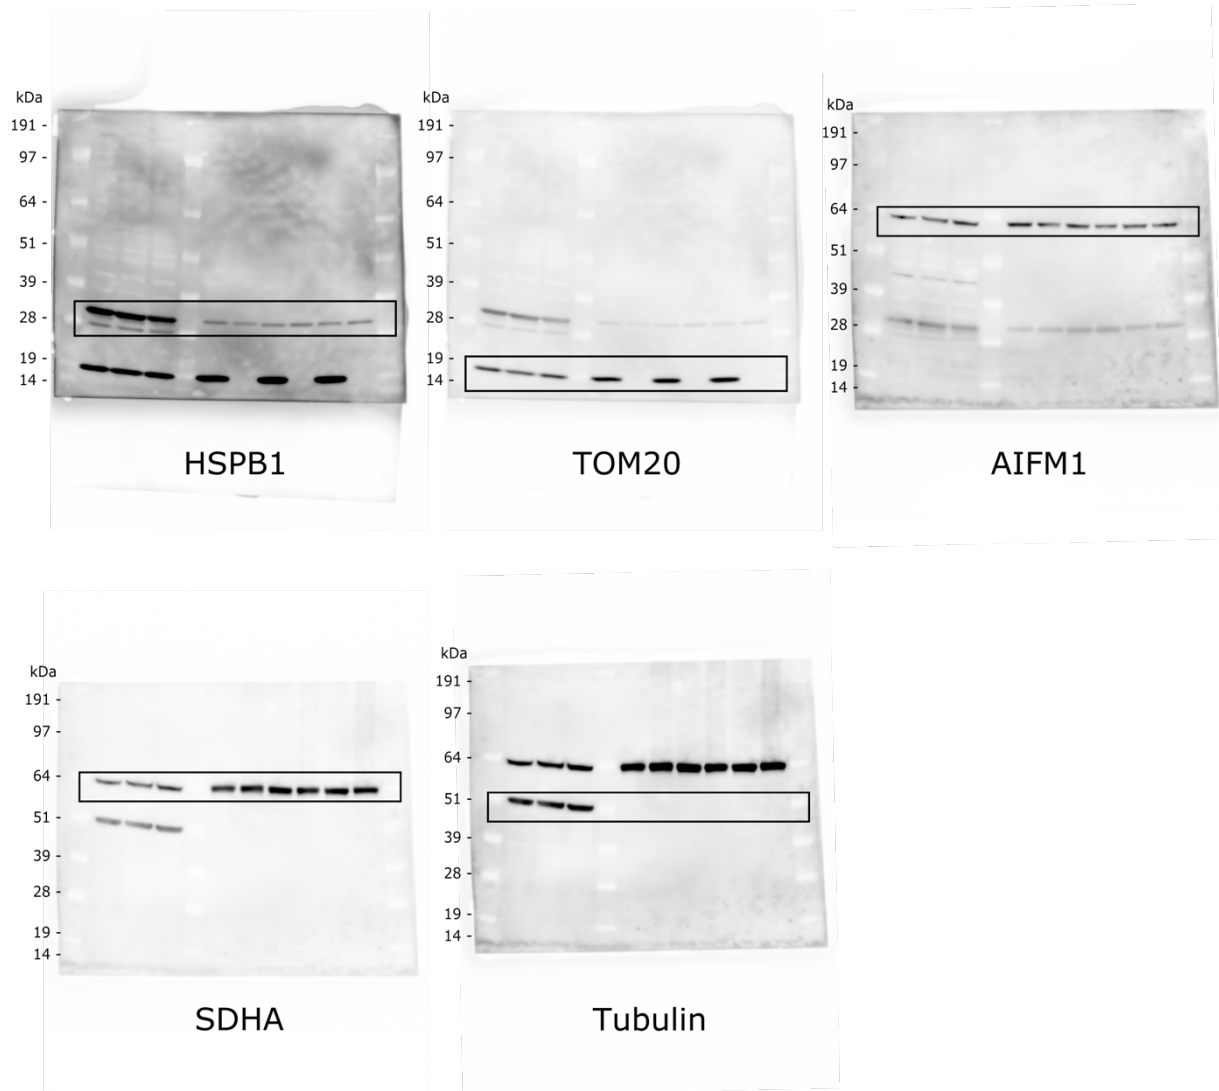

40  
41  
42  
43  
44  
45  
46  
47  
48  
49

50 **Figure 2f**

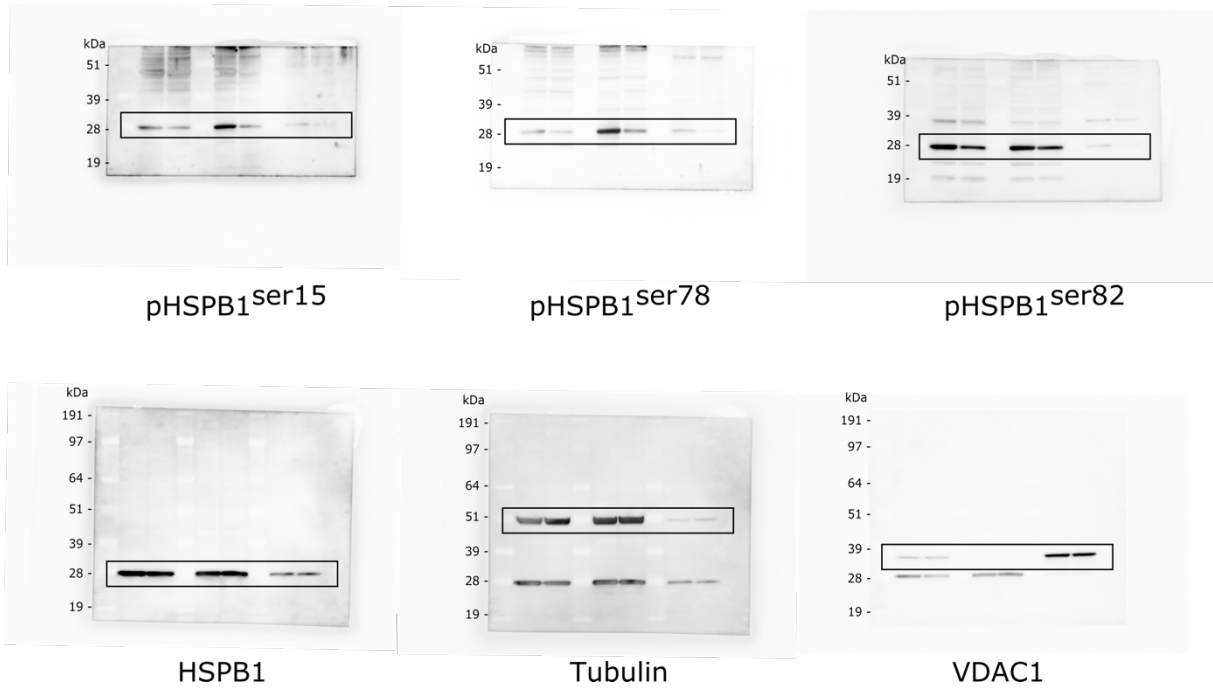

51

52
