# Supplementary material for: Small heat shock proteins operate as molecular chaperones in the mitochondrial intermembrane space
Source: PubMed Central journal article supplement (PMC10014586; doi:10.1038/s41556-022-01074-9), 2023-01-23
Supplement: 41556_2022_1074_MOESM17_ESM.pdf [file 41556_2022_1074_MOESM17_ESM.pdf]

1

## Extended data Figures

### 2 Extended Data Figure 4

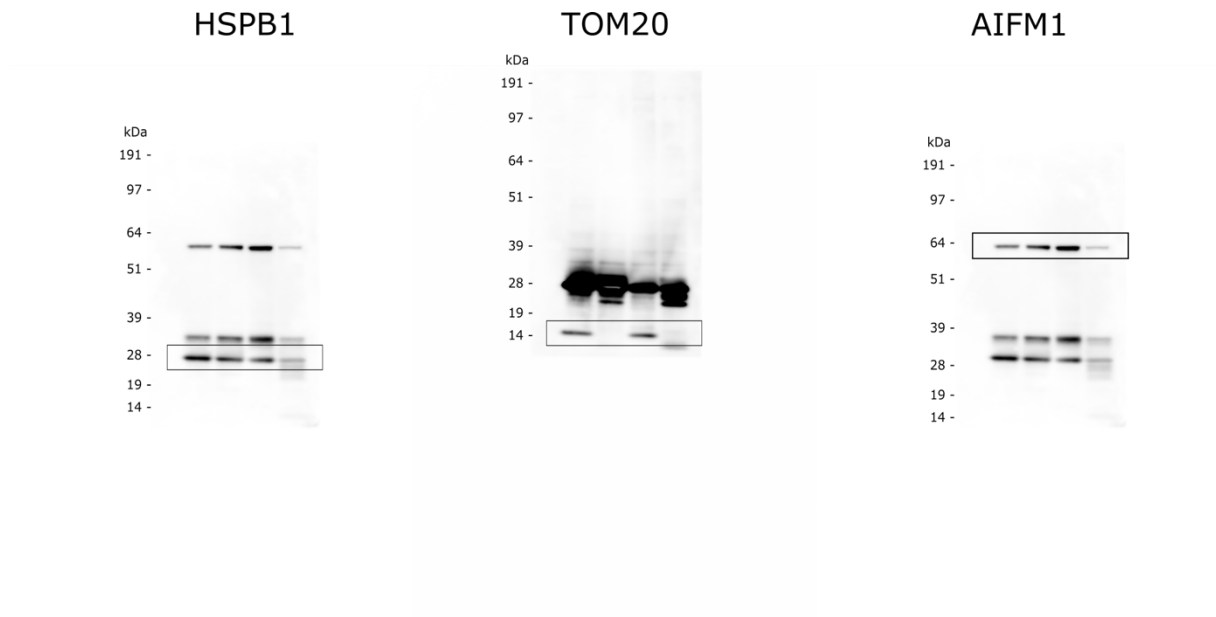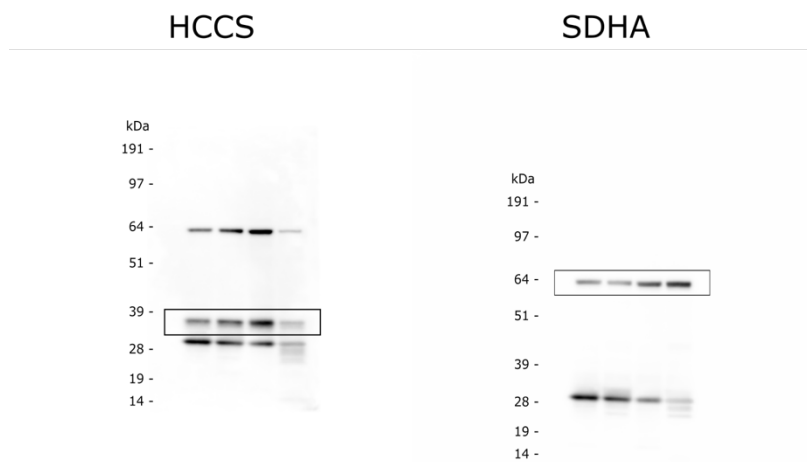

3

4

5

6

7

8

9

10 **Extended Data Figure 4 (continued)**

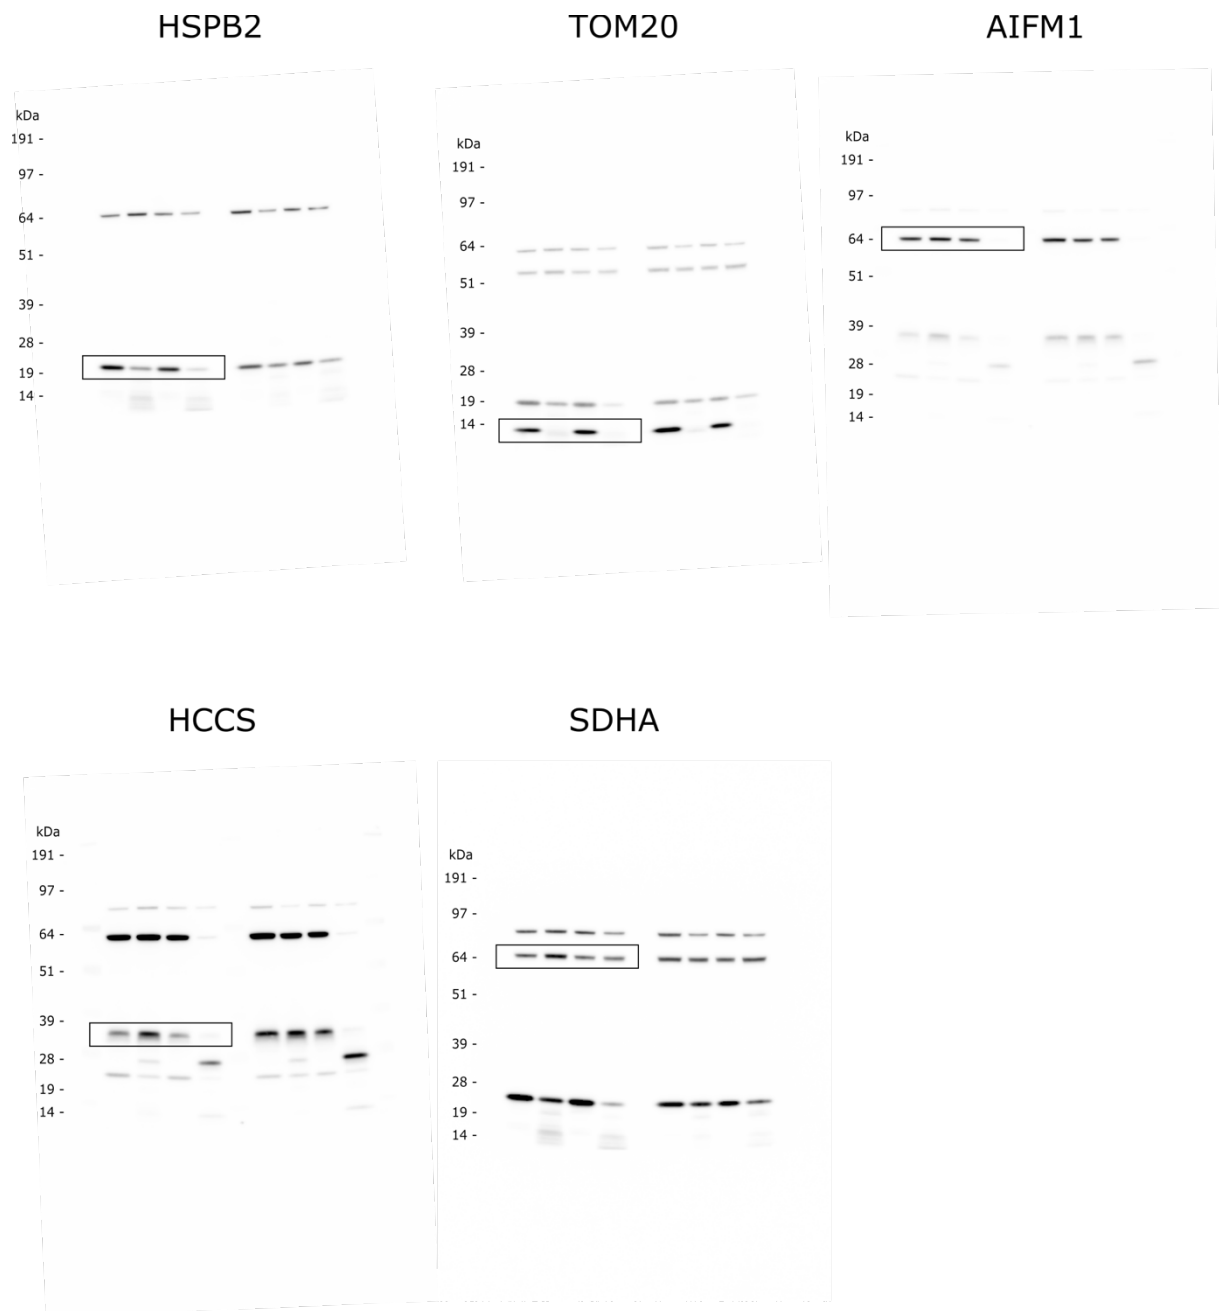

11

12

13

14

15

16

17

18 **Extended Data Figure 4 (continued)**

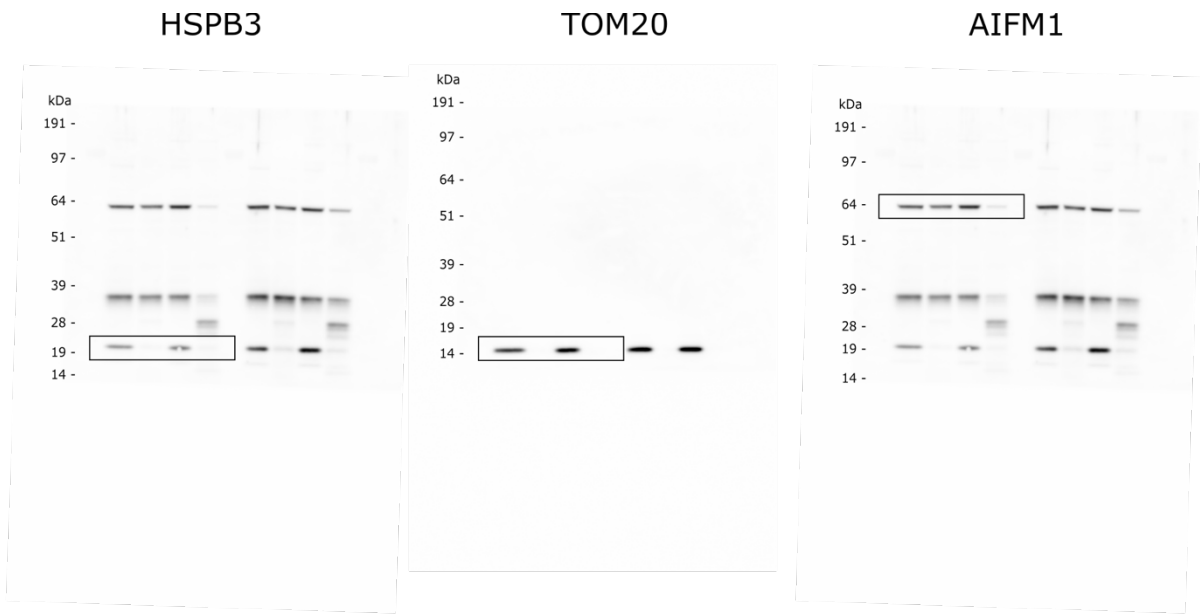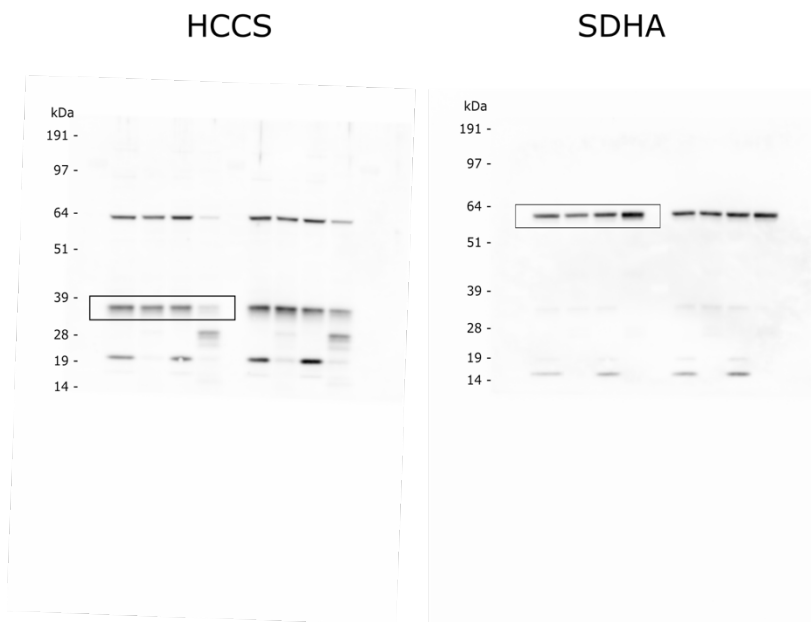

19

20

21

22

23

24

25

26

27 **Extended Data Figure 4 (continued)**

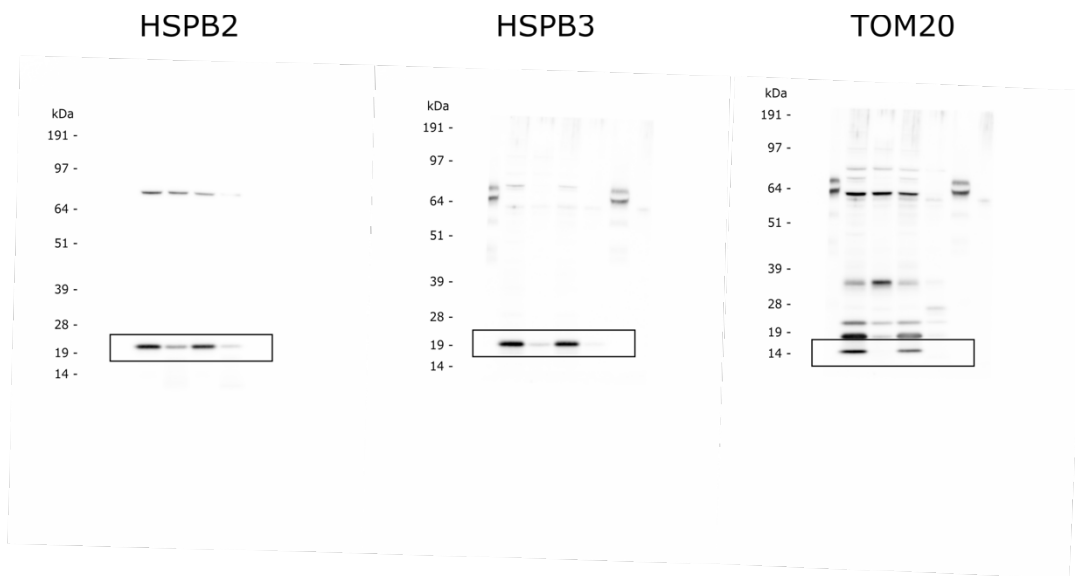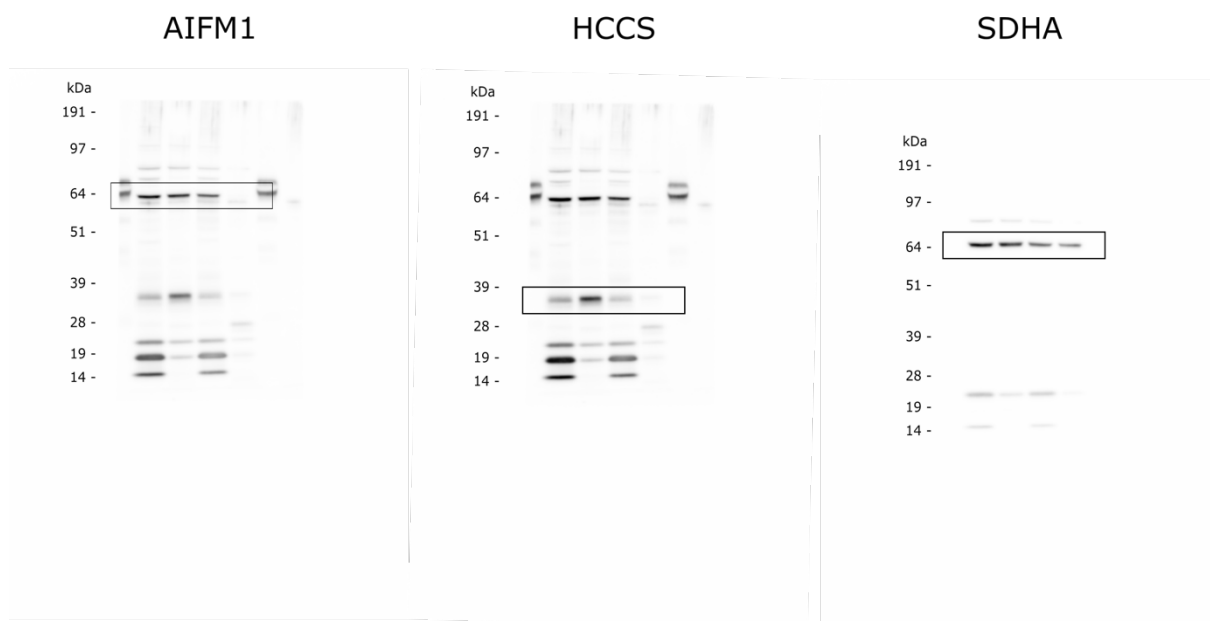

28  
29  
30  
31  
32  
33  
34  
35

36 **Extended Data Figure 4 (continued)**

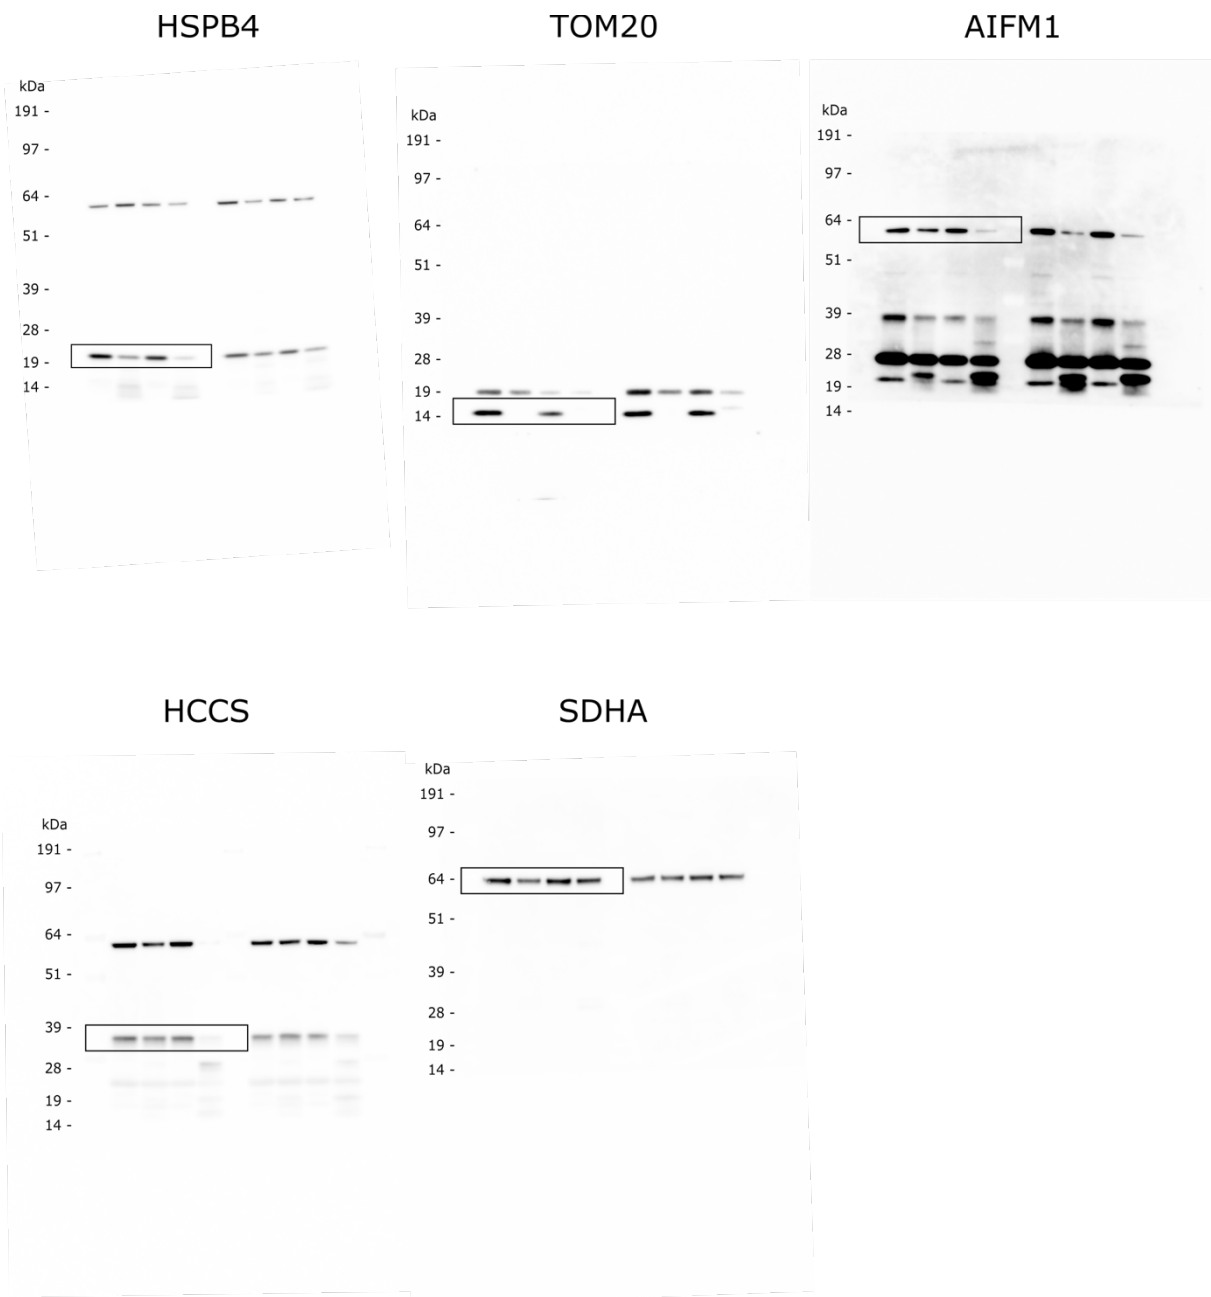

37

38

39

40

41

42

43

44

45 **Extended Data Figure 4 (continued)**

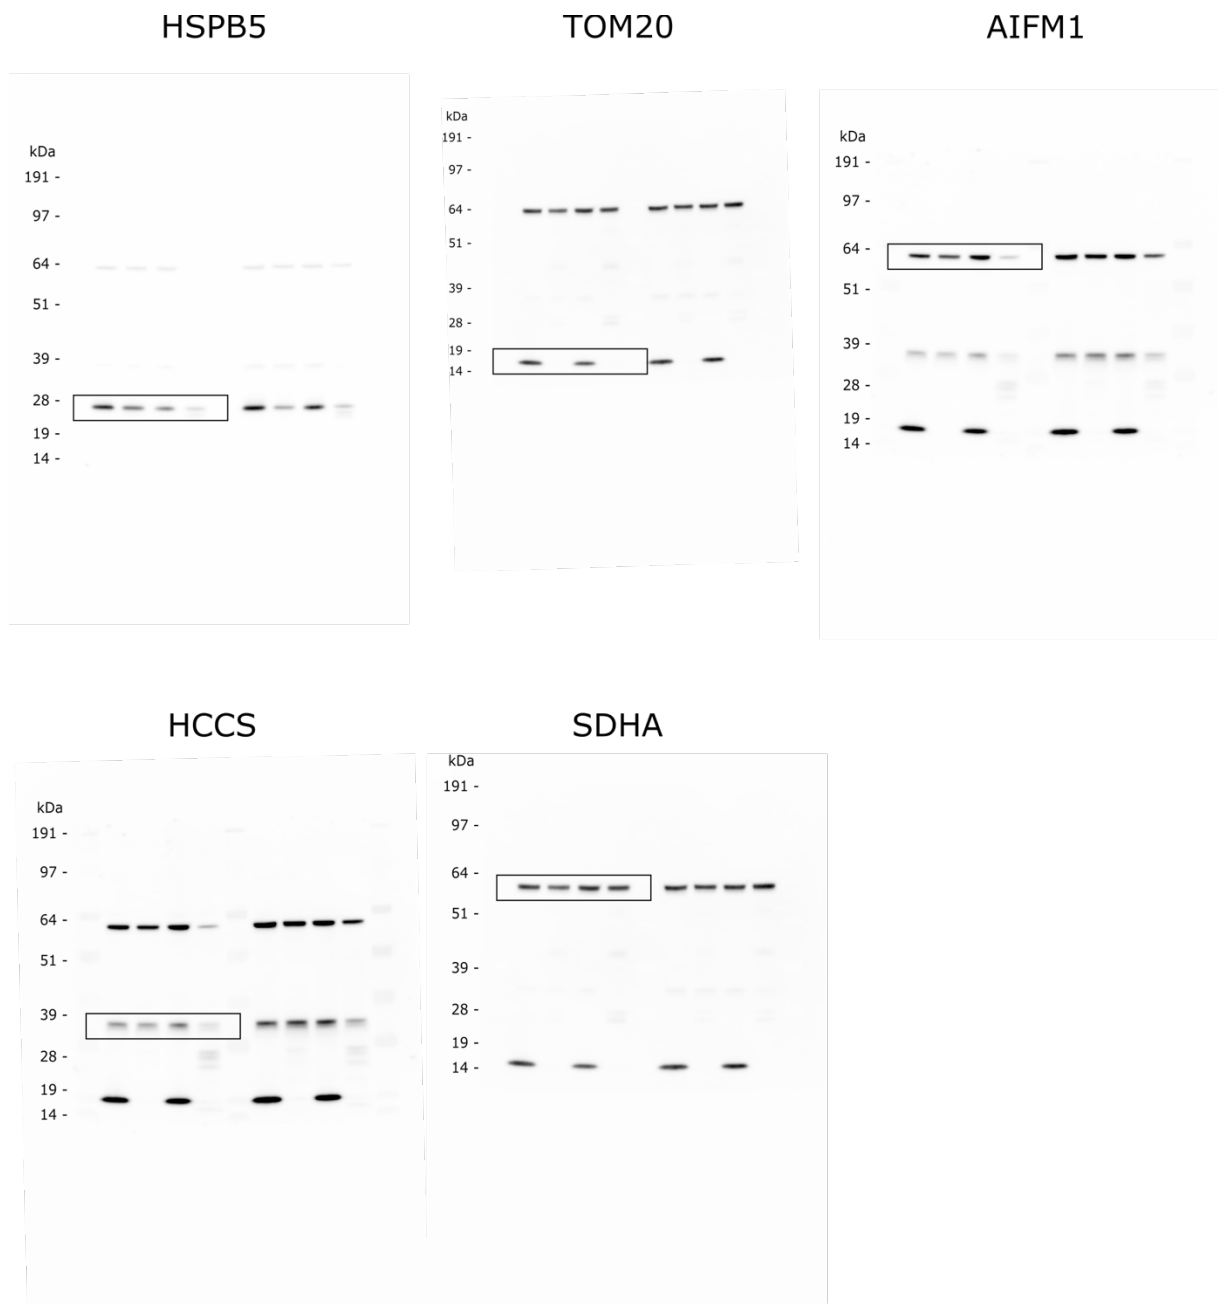

46

47

48

49

50

51

52

53 **Extended Data Figure 4 (continued)**

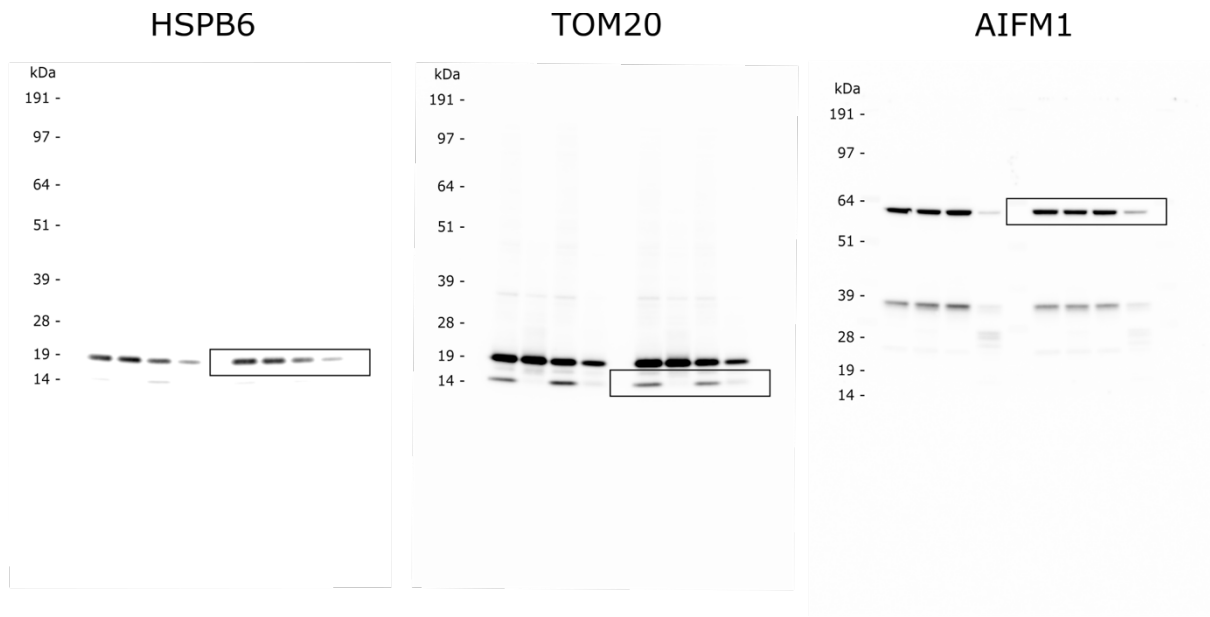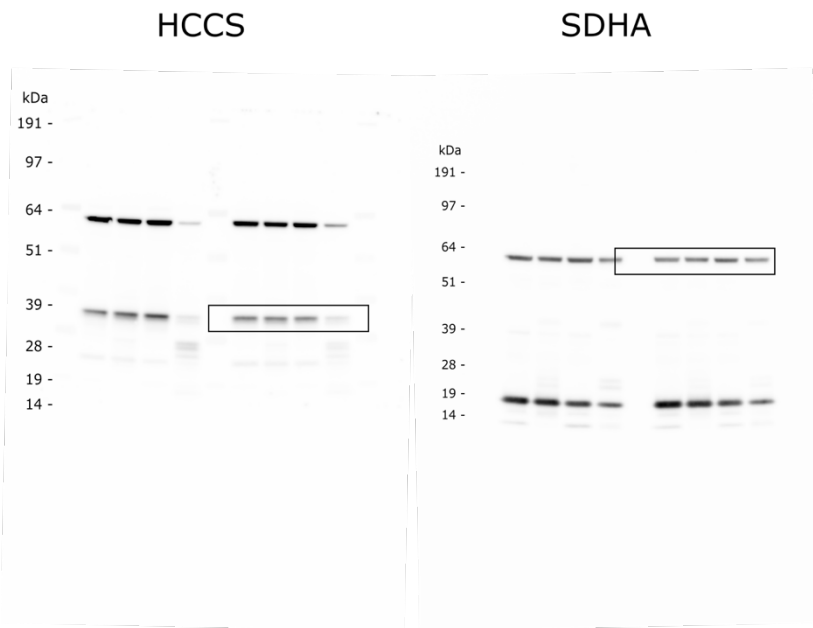

54

55

56

57

58

59

60

61 **Extended Data Figure 4 (continued)**

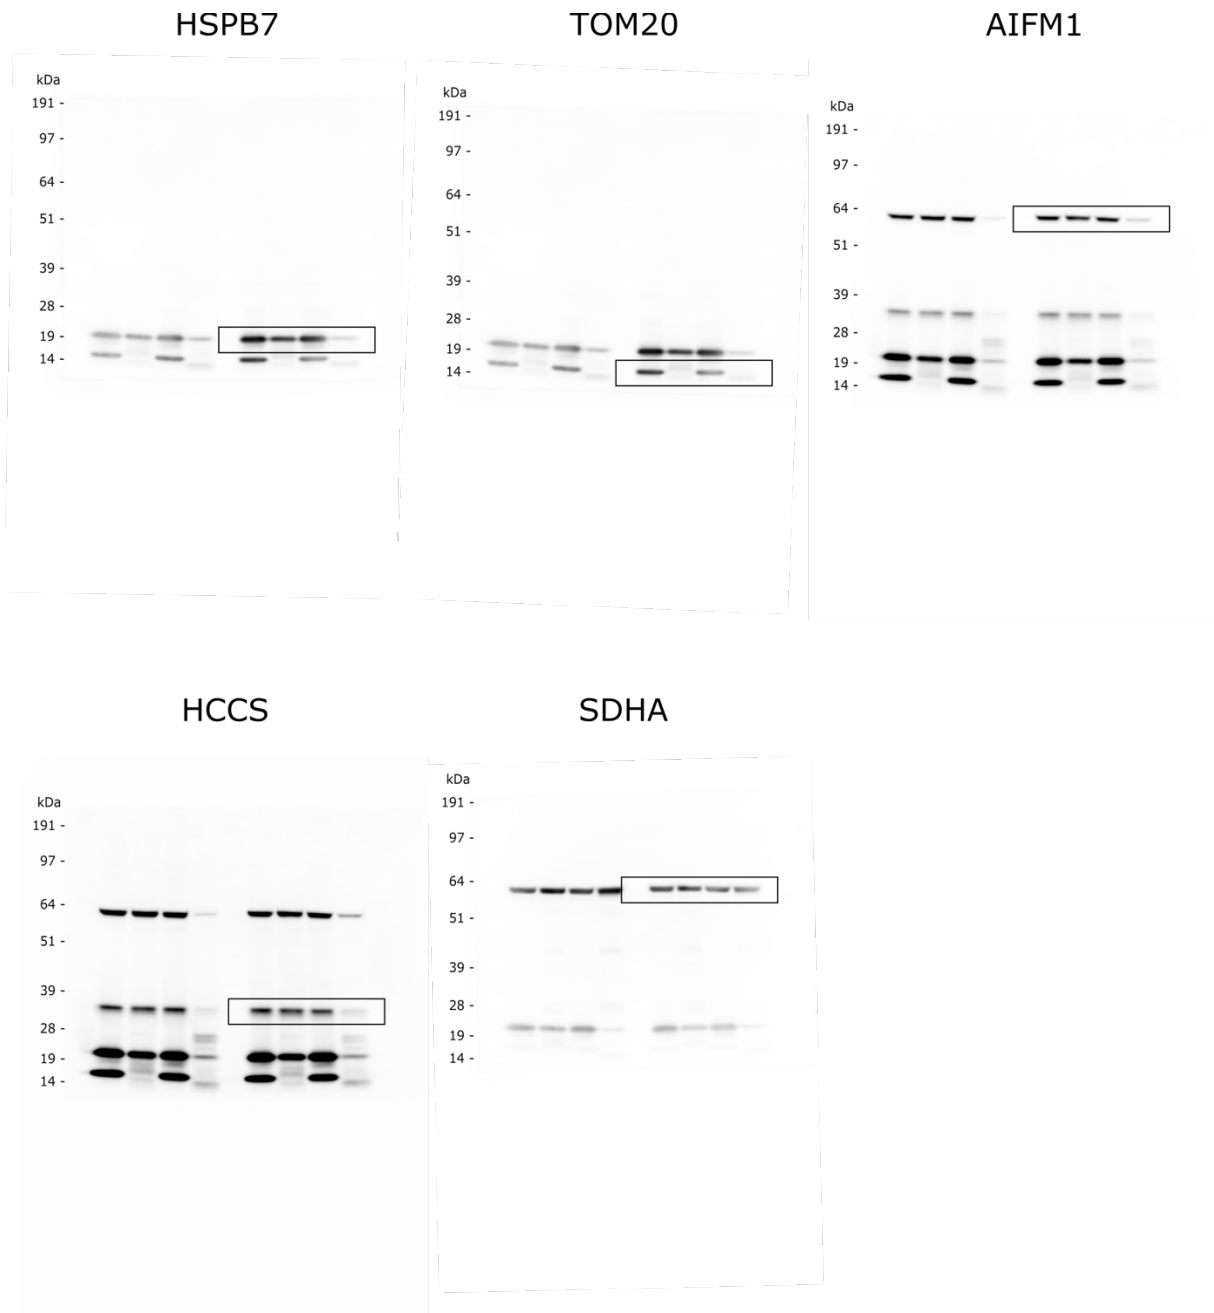

62

63

64

65

66

67

68



69 **Extended Data Figure 4 (continued)**

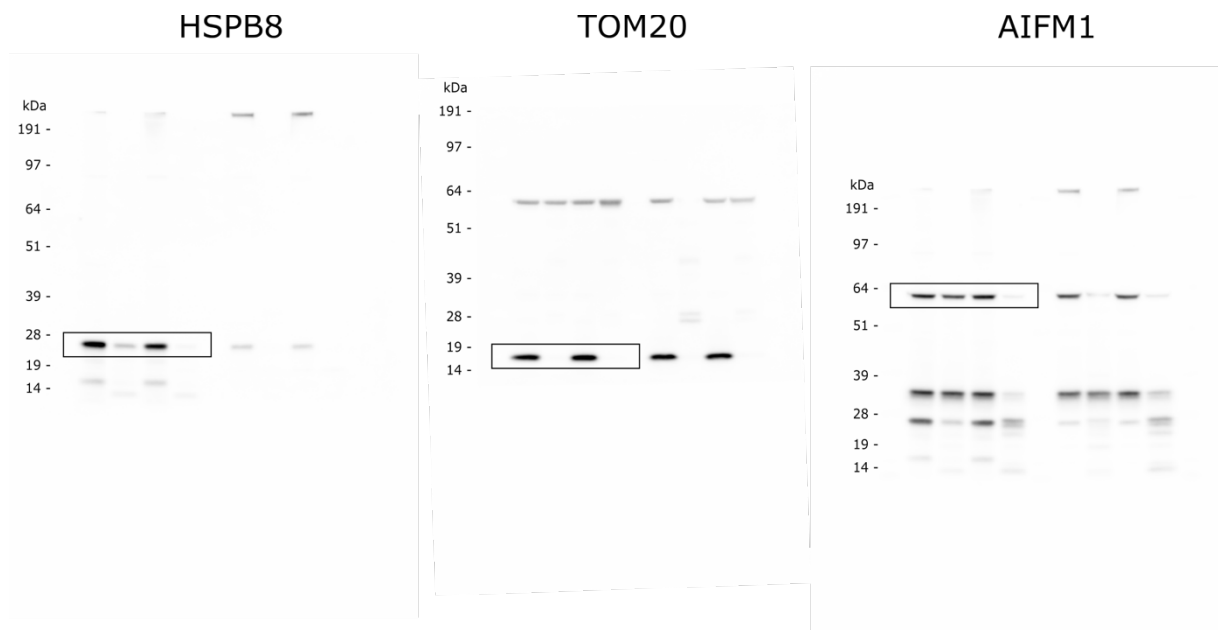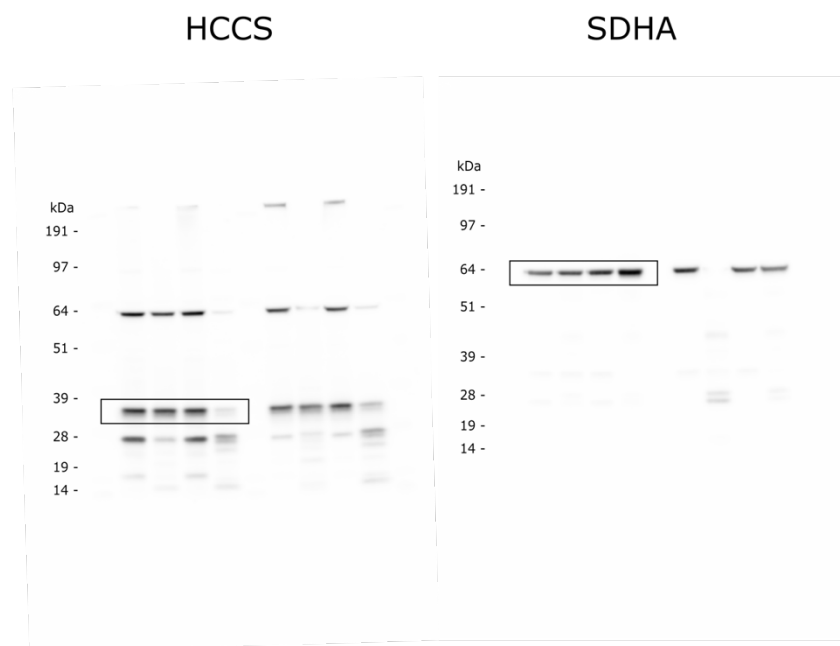

70

71

72

73

74

75

76

77 **Extended Data Figure 4 (continued)**

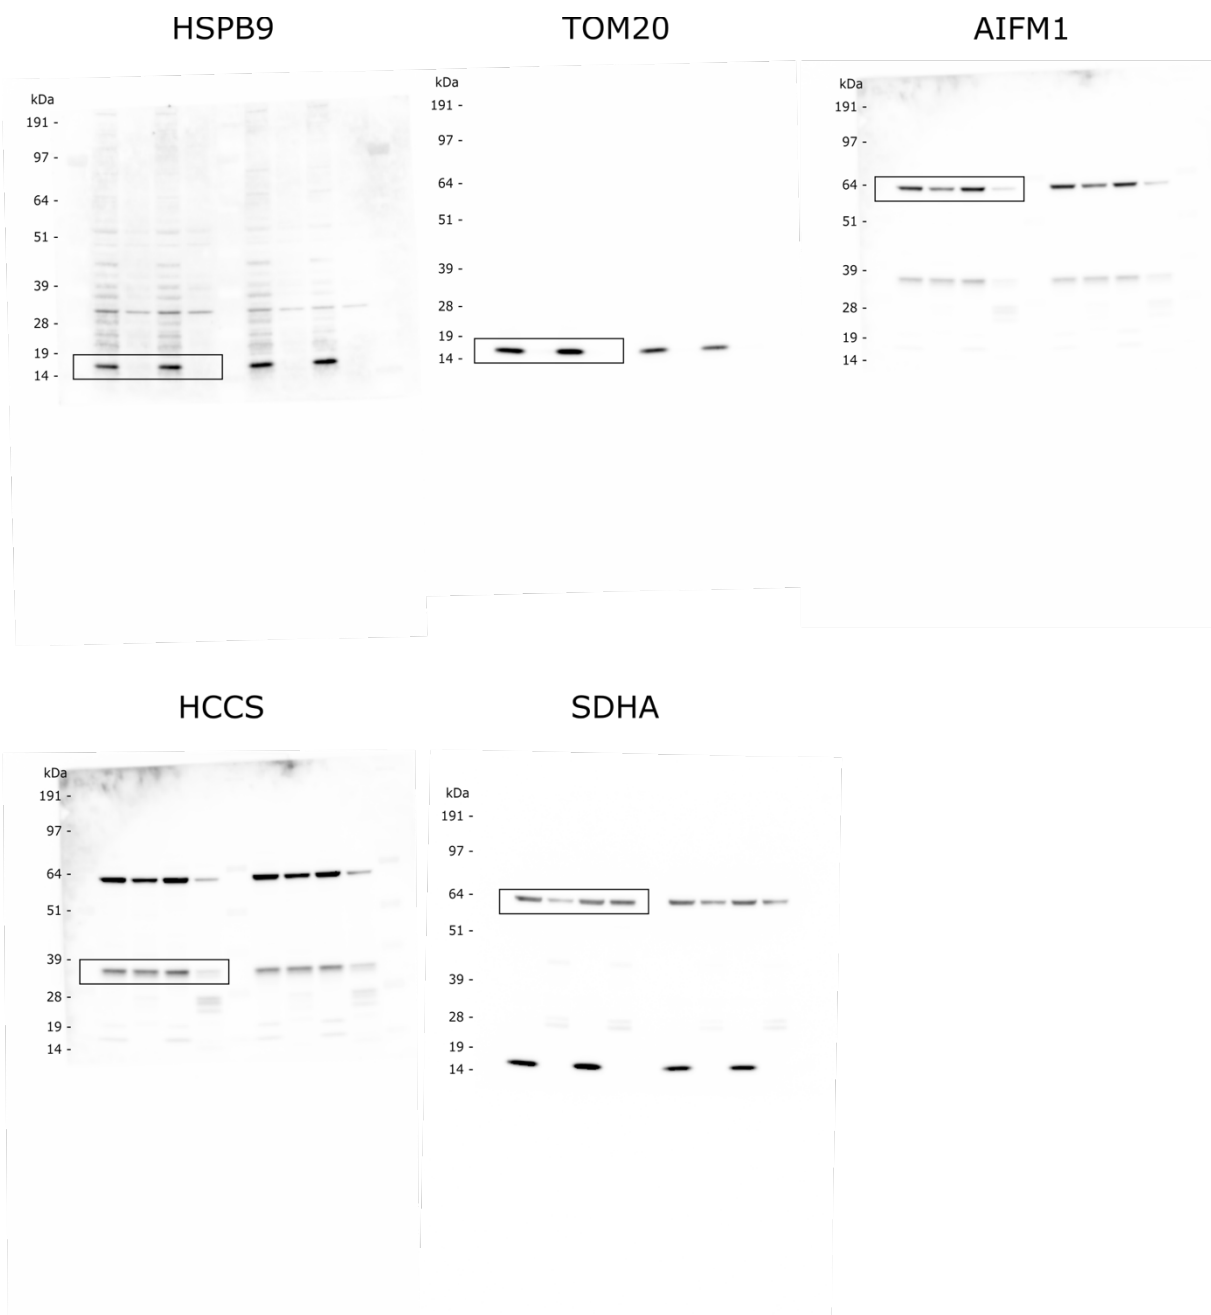

78

79

80

81

82

83
