# Supplementary material for: Small heat shock proteins operate as molecular chaperones in the mitochondrial intermembrane space
Source: PubMed Central journal article supplement (PMC10014586; doi:10.1038/s41556-022-01074-9), 2023-01-23
Supplement: 41556_2022_1074_MOESM18_ESM.pdf [file 41556_2022_1074_MOESM18_ESM.pdf]

1

## Extended data Figures

### 2 Extended Data Figure 5a

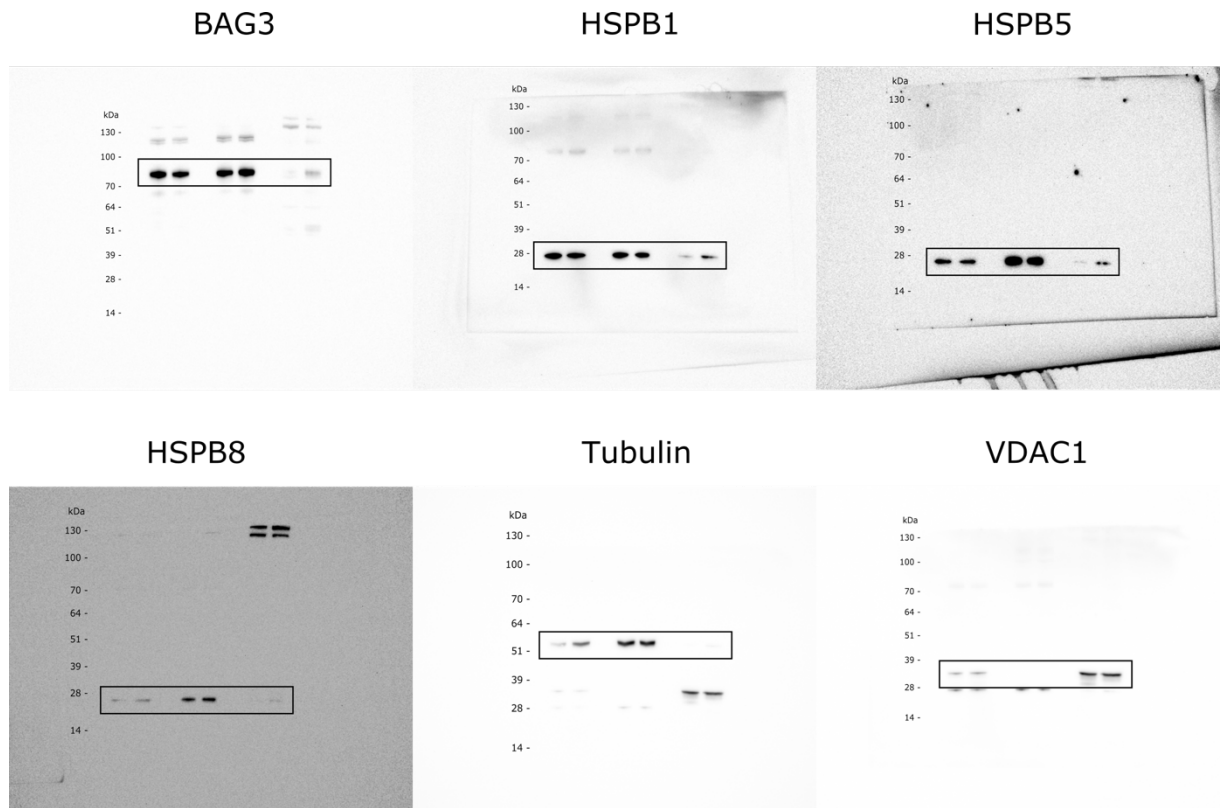

3

4

5

6

7

8

9

10

11

12

13

14

15

16 **Extended Data Figure 5b**

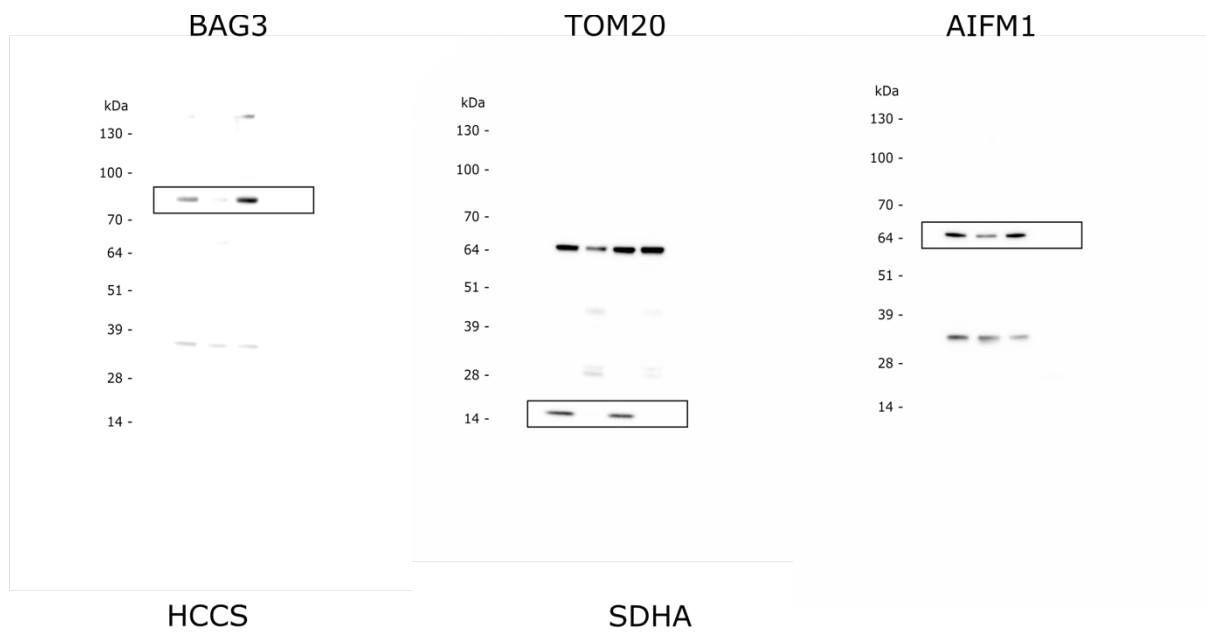

17  
18  
19  
20  
21  
22  
23  
24  
25

26 **Extended Data Figure 5c**

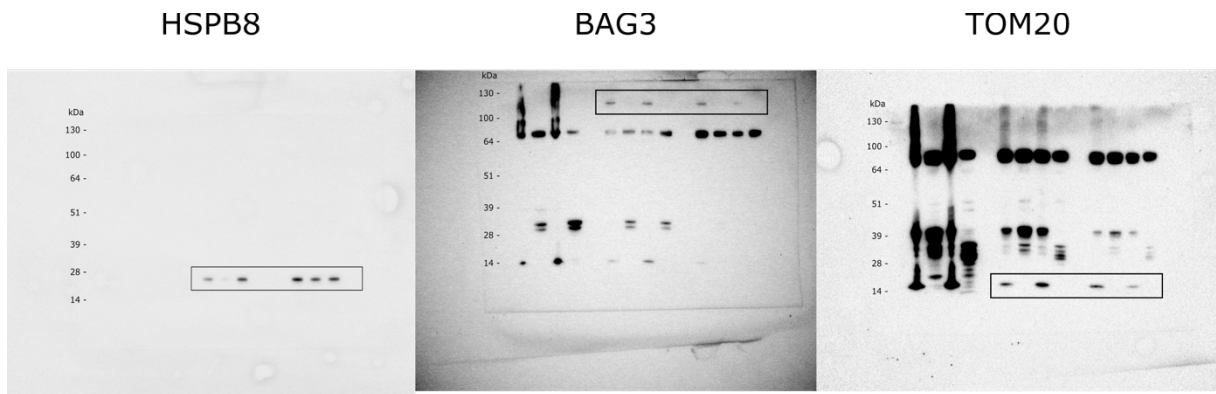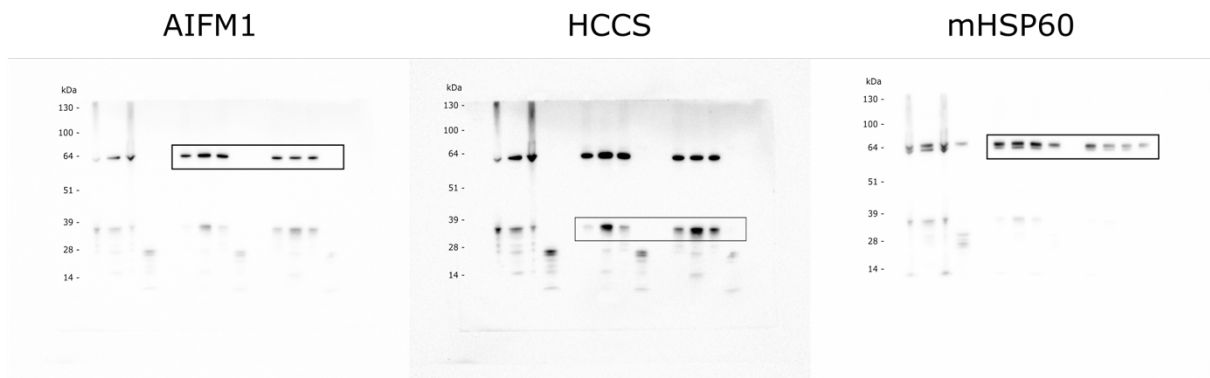

27

28

29

30

31

32

33

34

35

36

37

38
