# Supplementary material for: Small heat shock proteins operate as molecular chaperones in the mitochondrial intermembrane space
Source: PubMed Central journal article supplement (PMC10014586; doi:10.1038/s41556-022-01074-9), 2023-01-23

1

## Extended data Figures

### 2 Extended Data Figure 10a

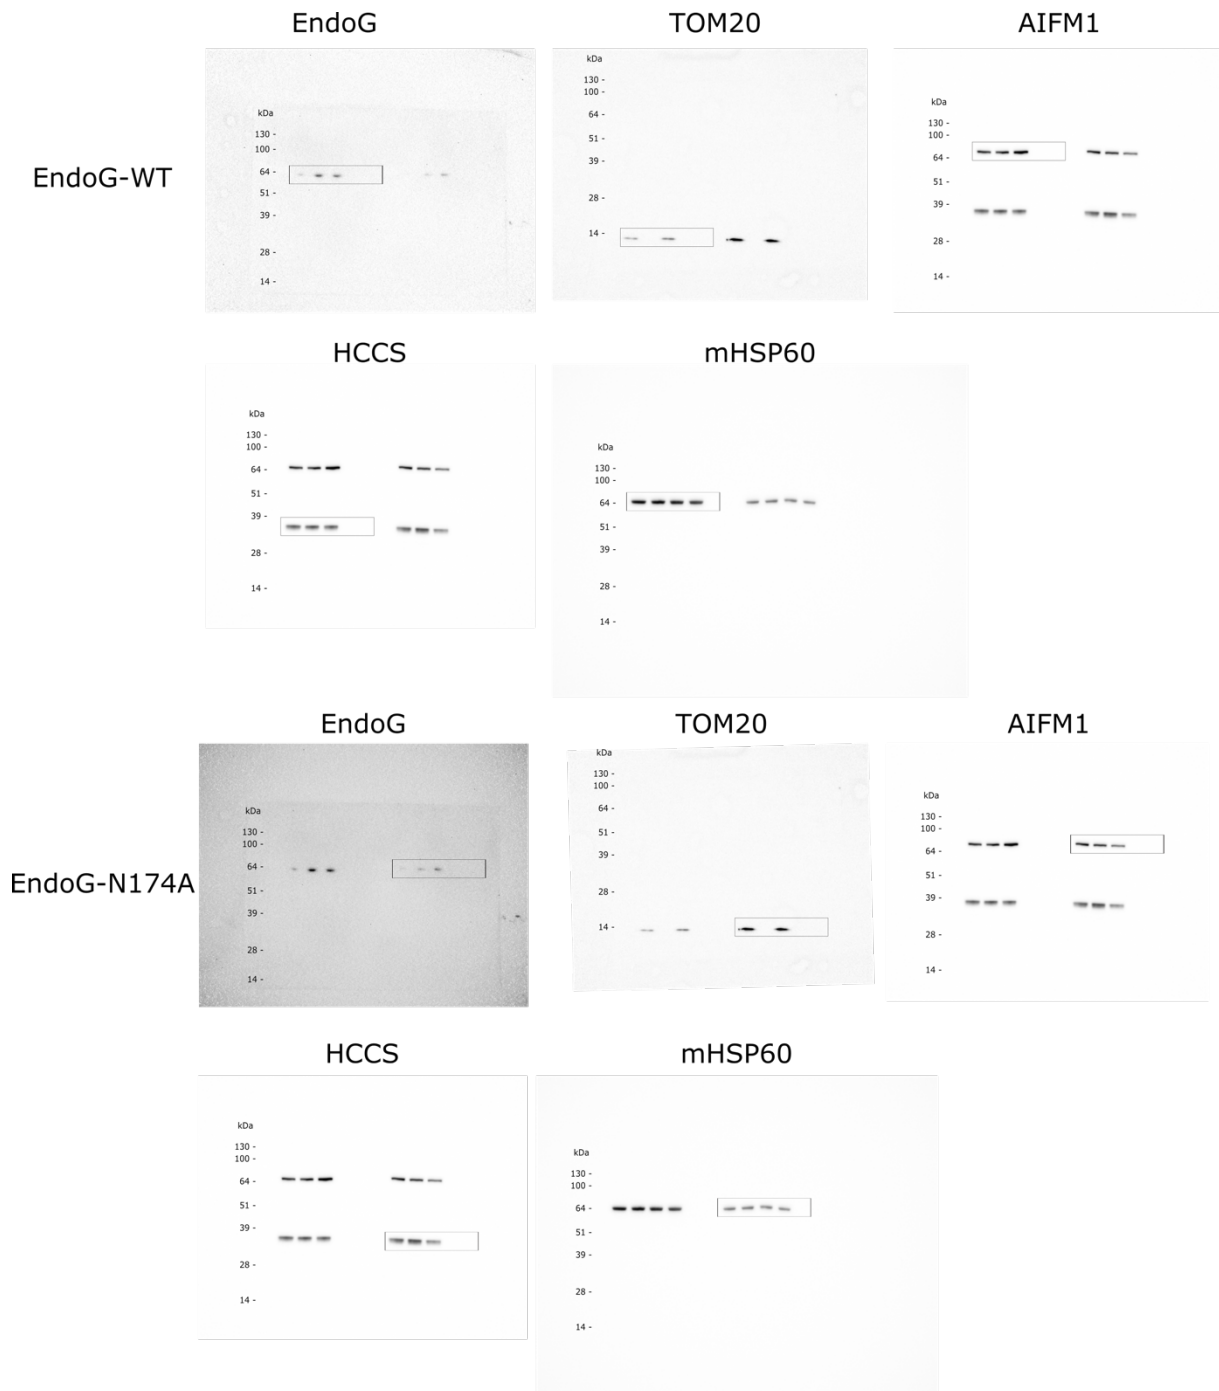

3

4

5

6

7

8 **Extended Data Figure 10b**

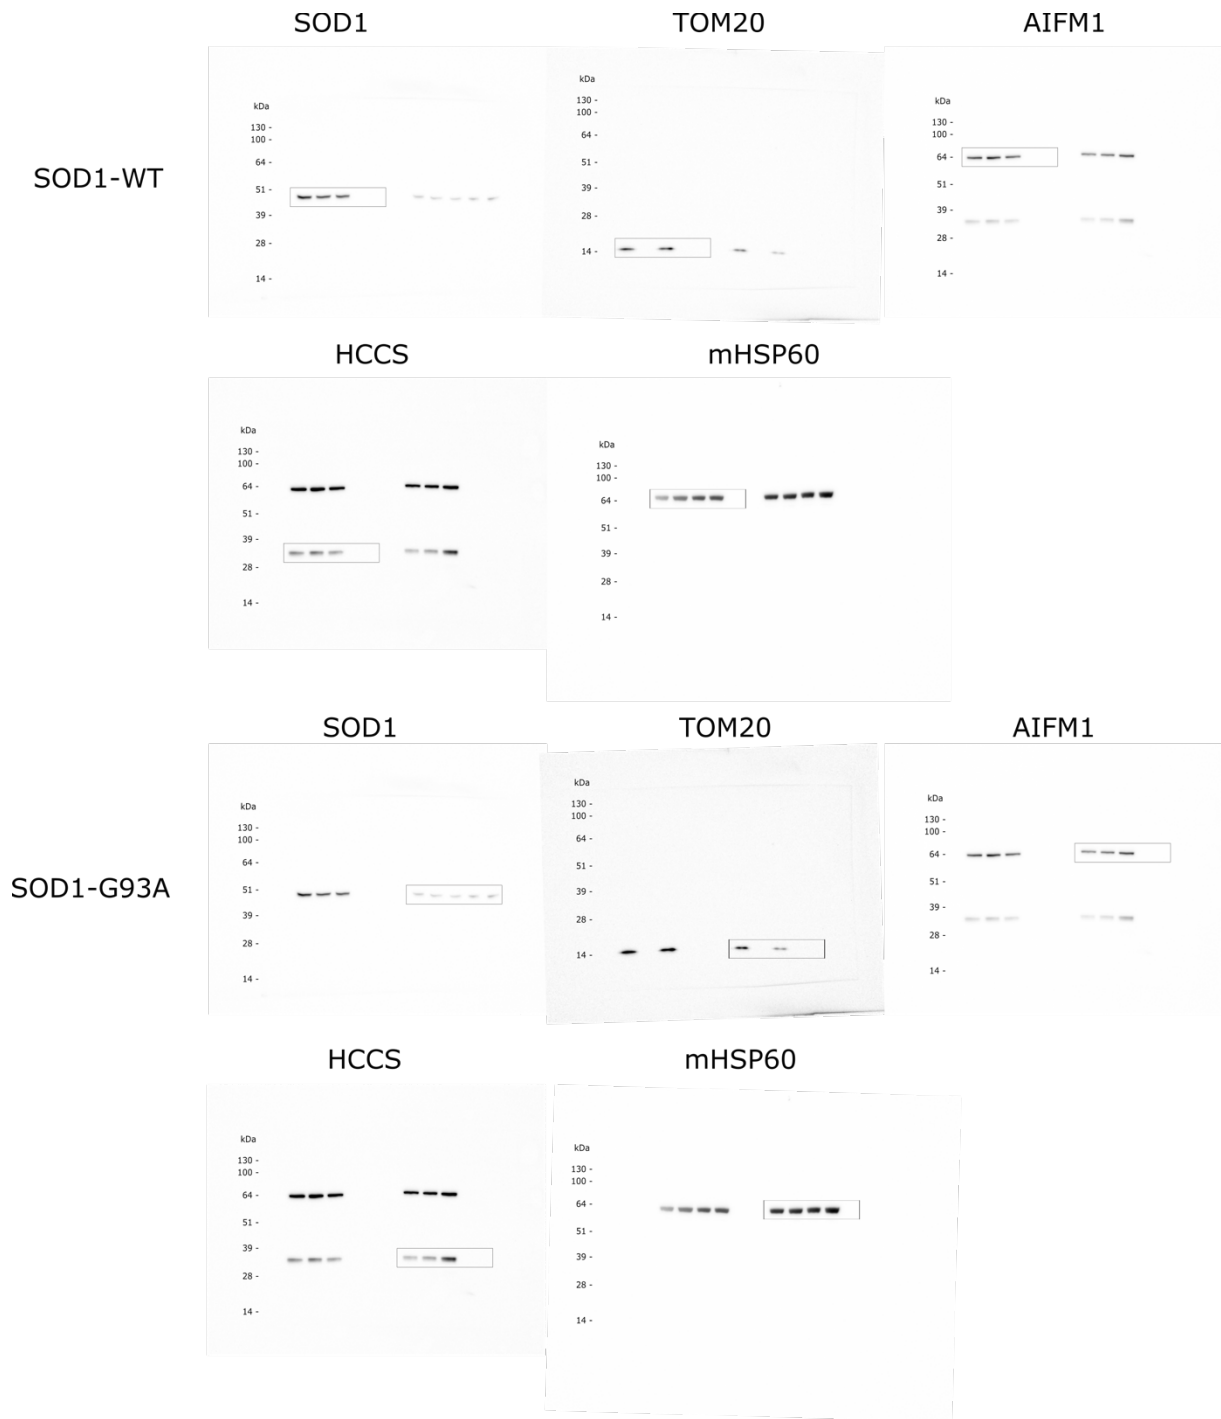

Supplement: 41556_2022_1074_MOESM20_ESM.pdf [file 41556_2022_1074_MOESM20_ESM.pdf]
